## 1 **Cortex-wide fast activation of VIP-expressing inhibitory neurons by reward and punishment**

2  
3 Zoltán Szadai<sup>1,3,5,\*</sup>, Hyun-Jae Pi<sup>2,4,\*</sup>, Quentin Chevy<sup>2,6,\*</sup>, Katalin Ócsai<sup>3</sup>, Florin Albeanu<sup>2</sup>, Balázs Chiovini<sup>1</sup>,  
4 Gergely Szalay<sup>1</sup>, Gergely Katona<sup>3</sup>, Adam Kepecs<sup>2,6,#</sup>, Balázs Rózsa<sup>1,#</sup>

5  
6 <sup>1</sup>Laboratory of 3D functional network and dendritic imaging, Institute of Experimental Medicine, Budapest-1083, Hungary.

7 <sup>2</sup>Cold Spring Harbor Laboratory, Cold Spring Harbor, NY, USA.

8 <sup>3</sup>MTA-PPKE ITK-NAP B – 2p Measurement Technology Group, The Faculty of Information Technology, Pázmány Péter  
9 Catholic University, Budapest-1083, Hungary.

10 <sup>4</sup>Volen Center for Complex Systems, Biology Department, Brandeis University, Waltham, MA, USA.

11 <sup>5</sup>János Szentágothai Doctoral School of Neurosciences, Semmelweis University, Budapest, Hungary.

12 <sup>6</sup>Departments of Neuroscience and Psychiatry, Washington University School of Medicine, St. Louis, MO, USA.

13  
14 \*,# Equal contribution

15 Correspondence: rozsabala@koki.hu & akepecs@wustl.edu

## 17 **SUMMARY**

18  
19 **Reward and punishment powerfully inform ongoing behaviors and drive learning throughout the brain,**  
20 **including neocortex. Yet it remains elusive how these global signals are represented and impact local**  
21 **cortical computations. Previously we found that in auditory cortex, VIP-expressing interneurons are**  
22 **recruited by reinforcement feedback. Here, we used 3D random-access two-photon microscopy and**  
23 **fiber photometry to monitor VIP neural activity in dozens of cortical areas while mice learned an**  
24 **auditory decision task. We show that reward and punishment evoke a rapid, cortex-wide activation of**  
25 **most VIP interneurons. This global recruitment mode of VIP interneurons showed variations in temporal**  
26 **dynamics in individual neurons and across areas. Neither their weak sensory tuning in visual cortex,**  
27 **nor their arousal state modulation was predictive of reinforcer responses of VIP interneurons. We**  
28 **suggest that VIP-expressing cortical inhibitory neurons transduce global reinforcement signals to**  
29 **provide disinhibitory control over local circuit computations and their plasticity.**  
30  
31

## 32 **INTRODUCTION**

33  
34  
35 Neocortex can be divided into a number of functionally distinct areas such as the visual, frontal, and motor  
36 cortical regions, each specializing in different roles (Felleman and Van Essen, 1991). Classical studies have  
37 established that the specialization of each region is reflected in their neural responses; for instance, neurons in  
38 the visual cortex respond to information about the visual world, while neurons in the motor cortex inform about  
39 actions. There is an additional layer of mechanisms known to modulate these cortical responses, spanning  
40 from the broad effects of arousal to the location-specific impact of attention (Harris and Thiele, 2011).  
41 Intriguingly, there is also a growing body of evidence suggesting that each area can represent non-classical  
42 features such as reward timing (Monk et al., 2020) and category representation (Goltstein et al., 2021) in visual  
43 cortex, visual stimuli and motor modulation in the auditory cortex (Attinger et al., 2017; Nelson et al., 2013),  
44 more recently observed across other cortical regions (Allen et al., 2017; Musall et al., 2019; Stringer et al.,

45 2019). Here we pursued a similar unexpected response pattern based on our previous observation that auditory  
46 cortex VIP interneurons respond not only to auditory stimuli but also to reward and punishment (Pi et al., 2013).  
47

48 VIP expression demarcates a small interneuron subpopulation (15-20%) located mostly in the upper layers of  
49 the cortex (Acsady et al., 1996; Kim et al., 2017). Previous studies have identified a cortical circuit motif  
50 controlled by VIP interneurons that preferentially inhibit other interneurons and thereby disinhibit principal  
51 neurons (Lee et al., 2013; Pfeffer et al., 2013; Pi et al., 2013). In this circuit, VIP interneurons mainly inhibit  
52 somatostatin interneurons, which tend to exert an inhibitory drive on the dendrites of cortical pyramidal neurons  
53 (Gentet et al., 2012). Such disinhibition could lead to the selective amplification of local processing and serve  
54 the important computational functions of gating and gain modulation (Pi et al., 2013). Hence, one proposed role  
55 for VIP interneurons is to gate the integration and the plasticity of the synaptic inputs onto pyramidal neurons  
56 (Letzkus et al., 2015; Williams and Holtmaat, 2019). The same stereotyped connectivity was found in  
57 functionally and cytoarchitecturally different regions of the brain, across the auditory, prefrontal (Pi et al.,  
58 2013), visual (Pfeffer et al., 2013), and somatosensory (Gasselín et al., 2021; Lee et al., 2013) cortices, and in  
59 the amygdala (Krabbe et al., 2019). However, it is not known whether VIP interneurons have similarly  
60 stereotyped functional roles across cortical regions.

61  
62 VIP interneurons have been shown to have a multiplicity of roles in sensory processing, arousal modulation,  
63 learning, and plasticity. First, studies in the primary sensory regions – barrel, auditory, and visual cortices –  
64 have demonstrated that tactile, auditory, and visual stimuli drive VIP neuron activity in diverse ways (Ibrahim  
65 et al., 2016; Khan et al., 2018; Kuchibhotla et al., 2017; Mesik et al., 2015; Pi et al., 2013; Sachidhanandam et  
66 al., 2016). However, the sensory tuning of VIP neurons tends to be weak compared to that of principal neurons.  
67 Second, VIP interneuron activity is highly correlated with the changes in pupil dilation and locomotion,  
68 suggesting a role in modulating cortical processing across arousal states (Dipoppa et al., 2018; Fu et al., 2014;  
69 Garcia-Junco-Clemente et al., 2017; Jackson et al., 2016; Pakan et al., 2016; Reimer et al., 2014; Zhang et al.,  
70 2014), while other reports show that locomotion modulates sensory processing independently from VIP  
71 activation (Yavorska and Wehr, 2021). Finally, optogenetic or pharmacogenetic inhibition (Donato et al., 2013;  
72 Fu et al., 2015; Kamigaki and Dan, 2017) of VIP interneurons, as well as their developmental dysregulation  
73 (Batista-Brito et al., 2017; Fu et al., 2015) impairs learning and plasticity in sensory discrimination and memory-  
74 guided tasks (Batista-Brito et al., 2017; Kamigaki and Dan, 2017).

75  
76 We sought to investigate common rules that recruit VIP interneurons. Our starting point was the observation  
77 that auditory cortical VIP neurons respond not only to auditory stimuli but also to reward and punishment (Pi et  
78 al., 2013). VIP cells have been reported to respond to reward in hippocampus and medial prefrontal cortex and  
79 to foot shock in amygdala (Krabbe et al., 2019; Pinto and Dan, 2015; Turi et al., 2019). Those later observations  
80 fit the function of these areas in learning and plasticity. In contrast, such activity was not found in the dorsal  
81 cortex (Khan et al., 2018; Sachidhanandam et al., 2016). This questions the existence of a global reinforcement-  
82 related VIP interneuron recruitment that would support associative learning. To address this, we set up to  
83 systematically record VIP interneurons across the whole dorsal cortex during an auditory decision task. To  
84 allow simultaneous monitoring of large number of VIP interneurons across a variety of cortical regions, we used  
85 3D acousto-optical (AO) two-photon microscopy, providing both a high signal-to-noise ratio (SNR) and high  
86 temporal resolution across large volumes. To gain access to deeper-lying cortical regions like medial prefrontal  
87 and auditory cortices, we used fiber-photometry and measured the bulk activity of VIP interneurons. We show  
88 that most VIP interneurons across cortex are indeed robustly activated by reward and/or punishment, and  
89 regional and task related behavioral factors contribute to shape their response profile differently. This global  
90 mode of recruitment of VIP interneurons is distinct from known arousal modulation of their activity and separate  
91 from the local response mode of VIP interneurons.

92

93 **RESULTS**

94

95 **Auditory discrimination task for mice**

96

97 To probe the behavioral function of VIP interneurons, we trained head fixed mice (n=16) on a simple auditory  
98 discrimination task (**Figure 1A**). Each trial began with the delivery of a 0.5 s auditory stimulus and mice were  
99 trained to lick (go trials) or withhold licking (no-go trials) based on the tone identity. Successful licking after tone  
100 delivery during go trials was rewarded with water (hit trials), while the absence of licking was not rewarded  
101 (miss trials). Licking for no-go trials triggered a mild air-puff punishment (false alarm, FA), which was omitted if  
102 the animal successfully withheld licking (correct rejection, CR). Mice learned this task over  $3 \pm 0.6$  (mean  $\pm$  SD)  
103 sessions after introducing the no-go tone, reaching a performance level of 80% (percentage of correct  
104 responses, Hit or CR). All recordings in this study were obtained early in training in order to also investigate  
105 VIP interneuron air puff, punishment-mediated responses (FA trials).

106

107 **Imaging VIP neurons with fast 3D acousto-optical microscopy**

108

109 To study the reinforcer-mediated dynamics of VIP interneurons across the cortex, we sought to simultaneously  
110 record a large number of VIP cells, across a large cortical volume. Because of their sparse cortical distribution,  
111 electrophysiological methods combined with optogenetics-assisted identification are less suitable for cortex-  
112 wide recordings of VIP interneurons. To overcome this challenge, we used random-access, three-dimensional,  
113 acousto-optical (3D-AO), two-photon microscopy (Katona et al., 2012; Nadella et al., 2016; Szalay et al., 2016).  
114 This method allows to restrict the measurement time solely to the regions of interests. Additionally, two-photon  
115 fluorescence excitation results in high imaging penetration required for *in vivo* imaging while also delivering  
116 high spatial resolution, therefore limiting neuropil contamination (Helmchen and Denk, 2005; Horton et al., 2013;  
117 Yildirim et al., 2019). Here, we used 3D chessboard scanning (Szalay et al., 2016) that generates small patches  
118 encompassing each neuron soma. This scanning mode preserves fluorescence information during brain  
119 movements and thereby allows motion correction in behaving animals (**Figures 1A and 1C**, for theoretical  
120 summary see (Marosi et al., 2019). Overall, chessboard scanning produces an additional  $\sim 170$ -fold increase in  
121 measurement speed and  $\sim 15$ -fold increase in SNR, compared to a high-speed resonant mirror-based system  
122 scanning the same volume (**Table S1**). Thus, we could simultaneously image the activity of up to 120  
123 GCaMP6f-expressing VIP cells (range: 12-120 cells) in a  $689 \mu\text{m} \times 639 \mu\text{m} \times 580 \mu\text{m}$  scanning volume at a  
124 minimum of 27.8 Hz rate (**Figures 1B and 1C**).

125

126

127

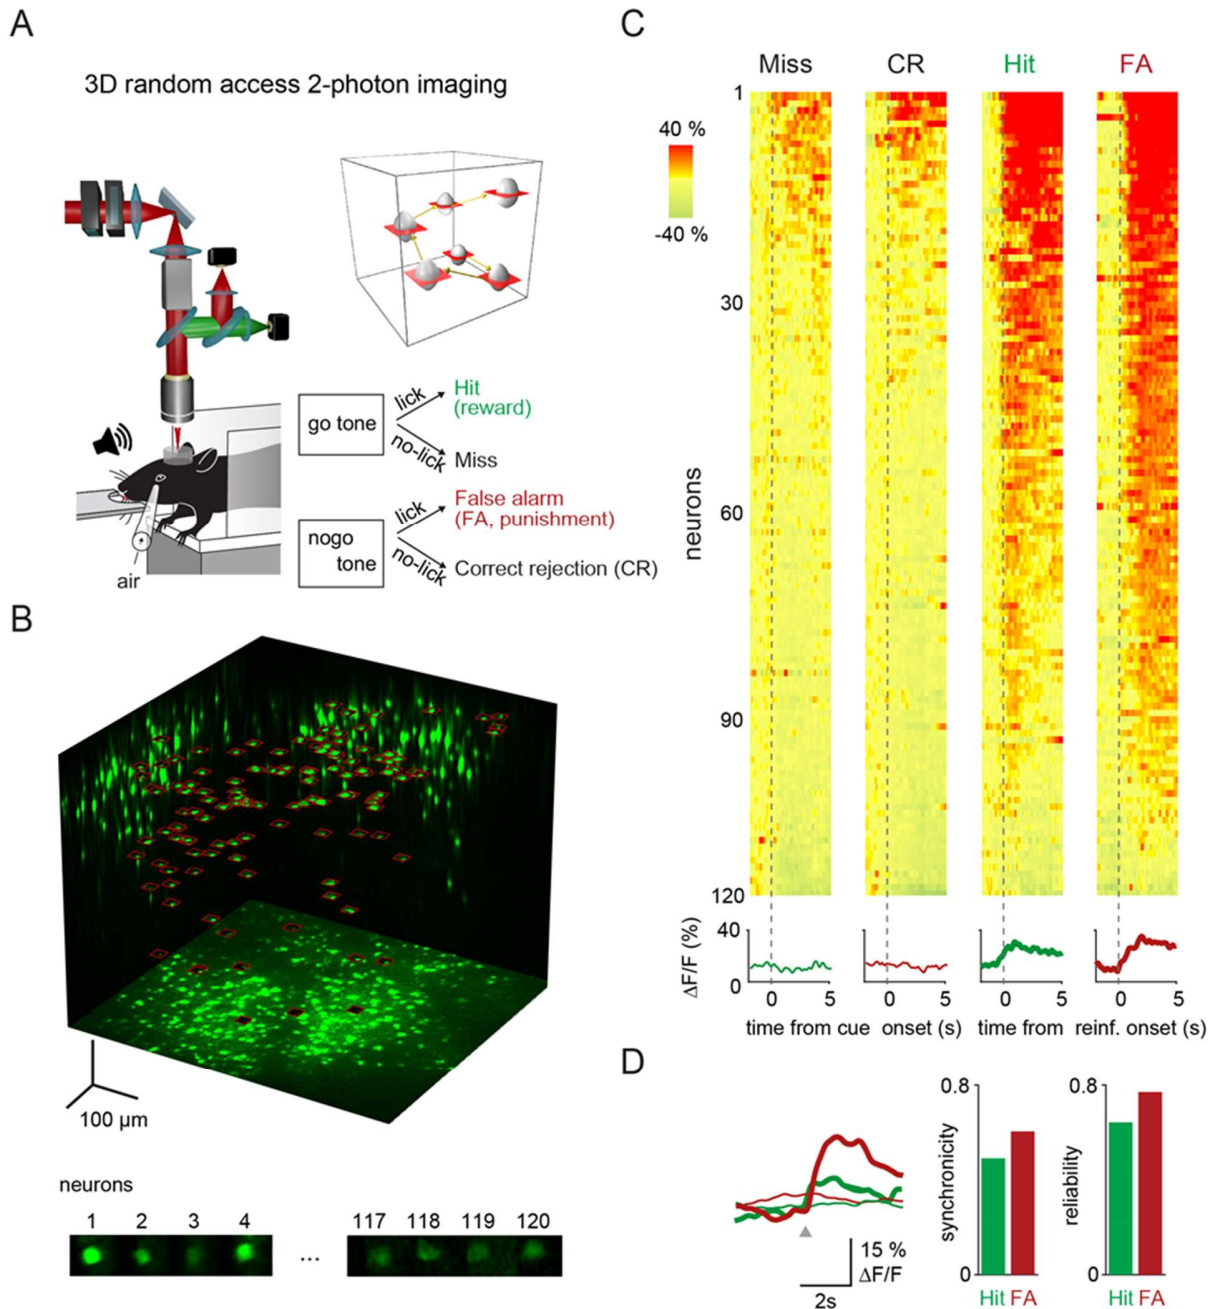

**Figure 1. 3D-random-access two-photon imaging of VIP neurons in an auditory discrimination task**

**A)** Schematic of the combined fast 3D AO imaging and behavior experiments. Head-restrained mice were trained to perform a sensory discrimination, an auditory go-no-go task during 3D AO imaging using the chessboard scanning method (inset).

**B)** Top, maximal intensity z and two side projections of the GCaMP6f-labeled VIP interneuron population imaged by fast 3D AO scanning. All 120 neurons within the cubature were simultaneously imaged using 120 frames of chessboard scanning (red frames). Bottom, exemplified image frames of chessboard scanning. Frames of chessboard scanning captures not only somata of the neurons but also the surrounding background information. In this way, fluorescence information is preserved during brain motion in behaving animals for motion correction.

140 **C)** *Top, somatic Ca<sup>2+</sup> responses recorded during example Miss, CR, Hit, and FA trials were aligned to the*  
141 *reward and punishment onset, and for Miss and CR trials, to the cue onset. Responses were ordered*  
142 *according to their maximum amplitude. Bottom, mean±SEM responses.*

143 **D)** *Left, average transients for Hit (thick green), FA (thick red), Miss (thin green) and CR (thin red) responses*  
144 *recorded from the 120 VIP interneurons. Right, average synchrony (mean ± SEM) and trial-to-trial*  
145 *repeatability (reliability) of the individual neuronal responses. Grey triangle marks the reinforcement onset*  
146 *in case of Hit and FA.*

### VIP neurons are simultaneously activated by reward and punishment in parietal cortex

147  
148  
149  
150 We first focused on measuring the calcium-related activity of VIP interneurons in the medial parietal association  
151 area (MPta). **Figure 1** shows an example recording of 120 VIP interneurons from the MPta while the animal  
152 performed the auditory discrimination task described above. We found that the majority of VIP interneurons  
153 responded to reward and punishment presentation (reward = 85%, punishment = 90%, reward and punishment  
154 = 75% of recorded VIP interneurons). Individual neurons showed a high reliability in their recruitment  
155 (percentage of active trials for a given neuron) of 64% and 77% for Hit and FA trials, respectively. Examining  
156 individual trials, 49% and 60% of VIP interneurons were simultaneously activated by reward and punishment,  
157 respectively (**Figure 1D**). On the contrary, PV interneurons, another class of GABAergic interneurons did not  
158 show a comparable homogeneity in their recruitment by primary reinforcers. Reward and punishment delivery  
159 induced an increase in activity of respectively 29% and 10% of PV interneurons recorded in MPta (**Figure S1E**).

### VIP neurons are activated by reward and punishment across dorsal cortex

160  
161  
162 We then extended recordings of VIP interneurons to most of dorsal cortex including visual, somatosensory,  
163 motor and parietal areas (**Figure 2A**, 16 mice, one to two areas per mouse). Among the 811 neurons imaged,  
164 65 VIP interneurons did not show statistically significant responses to behavioral events (e.g. auditory or visual  
165 stimulation, reward or punishment delivery) and were therefore excluded from further analyses. 83% and 85%  
166 of the remaining 746 VIP interneurons, responded to reward and punishment, respectively (**Figure 2D**). We  
167 found that 73% of the VIP interneurons significantly responded to both reward and punishment, similar to our  
168 observations in MPta. Further, the response of VIP interneurons to reward and punishment showed a strong  
169 correlation (Pearson correlation coefficient for average amplitudes: 0.73, **Figure 2E**). Reliable co-activation of  
170 VIP interneurons was also observed in our recordings extending throughout the dorsal cortex (**Figure S2**). On  
171 a given trial, 58% of VIP interneurons were simultaneously activated ( $57 \pm 2.4\%$  and  $58 \pm 2.5\%$ , for Hit and FA  
172 trials respectively, **Figure S2D**) with a reliability of 61% ( $59 \pm 1.7\%$  and  $63 \pm 2.4\%$ , for Hit and FA trials  
173 respectively, **Figure S2C**). In contrast, only 15% of the VIP interneurons responded to auditory cues in miss  
174 and correct rejection trials (**Figure 2C**).

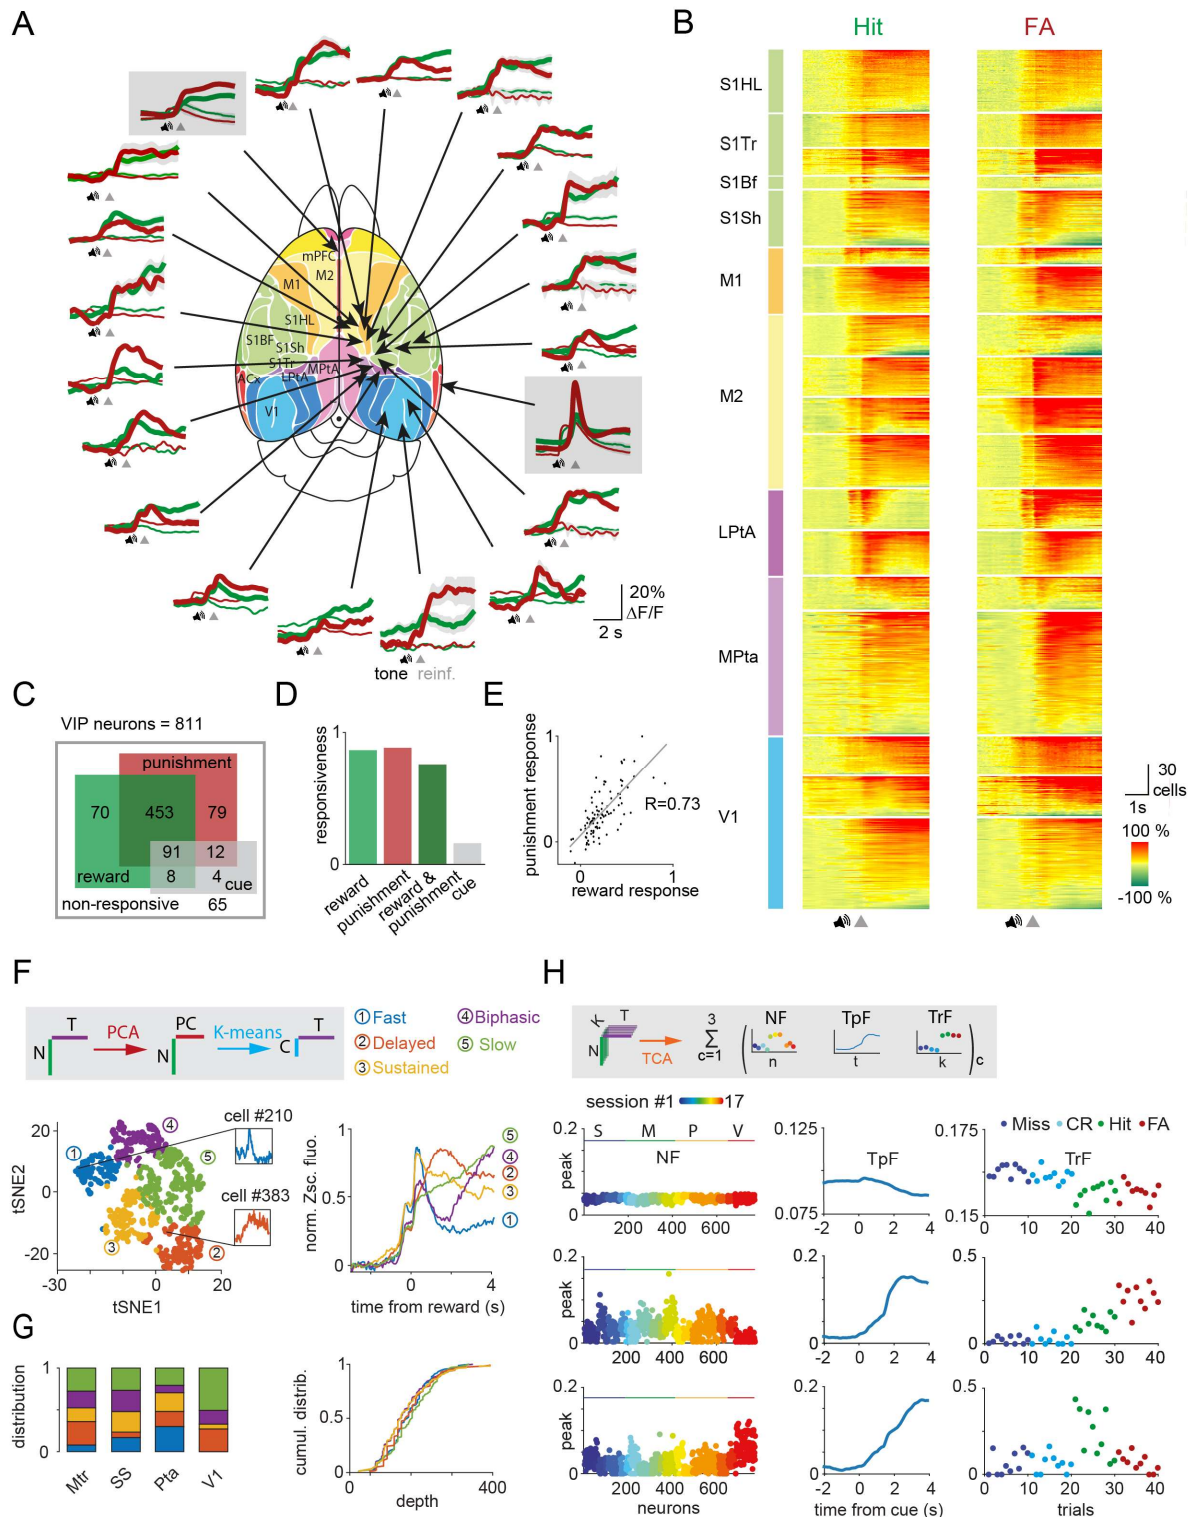

**Figure 2. Reward and punishment recruit VIP neuronal activity across the dorsal cortex**

**A)**  $Ca^{2+}$  responses of individual VIP interneurons recorded separately from 18 different cortical regions with fast 3D AO imaging were averaged for Hit (thick green), FA (thick red), Miss (thin green), CR (thin red).

- 182 *Fiber photometry data were recorded simultaneously from mPFC and ACx regions and are shown in gray*  
183 *boxes. Functional map (Kirkcaldie, 2012) used with the permission of the author.*
- 184 **B)** *Each line of the raster plots shows average neuronal response for Hit and FA. Abbreviations indicate color*  
185 *coded cortical recording positions shown in panel A. Responses were normalized in each region and*  
186 *ordered according to their maximum amplitude.*
- 187 **C)** *Responsiveness of 811 VIP interneurons for Hit and FA.*
- 188 **D)** *Bar chart of data from C.*
- 189 **E)** *Average response of individual VIP interneurons for FA as a function of the response for Hit. Note the high*  
190 *correlation ( $R=0.73$ ).*
- 191 **F)** *Left, T-distributed Stochastic Neighbor Embedding (tSNE) plot of the reward mediated activity of VIP*  
192 *interneurons after PCA. Individual neurons are color coded according to their cluster type obtained using a*  
193 *k-means clustering algorithm. Inserts show the average response of single rapidly (blue) or delayed*  
194 *(orange) activated VIP interneurons. Right, average GCaMP6f responses from different clusters of VIP*  
195 *interneurons after reward delivery.*
- 196 **G)** *Left, distribution of the clusters shown in panel F across different cortical areas. Right, cumulative*  
197 *distribution of the clusters shown as a function of cortical depth.*
- 198 **H)** *Top, schematics of temporal component analysis. Below: rank 3 TCA neural, temporal, and trial factors.*  
199 *Miss and CR trial factors were indicated here with dark and light blue dots. The second component clearly*  
200 *distinguishes between trials with and without reinforcement.*
- 201

## 202 Recruitment of VIP interneuron population by reward and punishment in the medial prefrontal 203 and auditory cortex

204 To probe additional but deep-lying cortical structures, we took advantage of the coherent recruitment of VIP  
205 interneurons by reinforcers and used fiber photometry (Cui et al., 2013; Gunaydin et al., 2014). This approach  
206 allowed us to simultaneously measure bulk calcium-dependent signals from VIP interneurons located in the  
207 right medial prefrontal (mPFC) and left auditory cortices (ACx) by implanting two 400  $\mu\text{m}$  optical fibers at these  
208 locations (n=6 mice, **Figure S1C**). Consistent with our previous electrophysiological results in ACx (Pi et al.,  
209 2013) and two-photon imaging from dorsal cortical regions, calcium-related signals from VIP interneurons in  
210 the ACx and mPFC were increased after reward and punishment delivery (in ACx: Hit =  $4.8 \pm 0.32$  %, FA =  
211  $10.9 \pm 0.03$  %; in mPFC: Hit =  $4.3 \pm 0.69$  %, FA =  $6.6 \pm 0.85$  %,  $\Delta F/F$  peaks, **Figure 2A**). We did not further  
212 analyze the FA responses in auditory cortex as those responses also had a sensory component linked to the  
213 white noise-like sound created by the air puff delivery. Similar to our single cell results, PV-expressing neuronal  
214 population in ACx did not show any significant change in activity after random reward delivery (**Figure S2F**).  
215 Concurrent recordings of VIP interneuron population in ACx and mPFC revealed heterogeneity in the dynamics  
216 of VIP interneuron activity during reward delivery (**Figure 2A**). VIP interneurons in the auditory cortex showed  
217 a phasic-like response to reward (peak time for Hit =  $0.06 \pm 0.036$  s, decay time constant = 2.7 s). In contrast,  
218 medial prefrontal VIP interneurons were slowly activated (peak time for Hit =  $3.08 \pm 0.968$  s, decay time constant  
219 = 7.75 s, **Figure 2A**). These population recordings confirmed the dominant contribution of reinforcement-related  
220 signals to VIP interneuron population responses but also reveal potential area-specific heterogeneity in the  
221 dynamics of VIP interneuron activity.

## 222 Heterogeneity in the dynamics of reinforcer-related activity of individual VIP interneuron

223 The difference in dynamics at the population level across different brain areas might be supported by  
224 heterogeneity in the individual response profiles of VIP interneurons. Thus, we sought to characterize the  
225 dynamics of VIP interneurons at a single cell resolution and across dorsal cortex using chessboard 3D AO  
226 recordings. We first focused on VIP interneurons activated upon reward delivery during the sensory  
227 discrimination task (n=606 cells). We applied principal component analysis (PCA) to the average reward  
228 responses of individual neurons to reward. We then clustered these responses using k-means clustering. This  
229 approach did not primarily separate neurons according to the recording sessions (**Figure S3A**). Rather, our  
230 clustering approach allowed us to delineate 5 groups of VIP interneurons (**Figure 2F**). Based on visual  
231 inspection of their mean temporal profiles, we labeled these groups as: 'fast' (n=109), 'delayed' (n=88),  
232 'sustained' (n=177), 'biphasic' (n=120) and 'slow' (n=112). Note that all of these response types share important  
233 similarities such as a phasic reward response and mostly differ in their subsequent temporal dynamics. We first  
234 considered the distribution of these 5 types of neuronal responses across different brain areas. We observed  
235 an overrepresentation of the 'fast' group in parietal cortex and of the 'slow' group in primary visual cortex  
236 (**Figure 2G**). The 'fast' group was absent from visual cortex (**Figure 2G**). To quantify this heterogeneity across  
237 cortical areas, we defined 5 feature vectors as the mean response of each cluster to rewards and then projected  
238 the reward response of each VIP interneuron onto these features (**Figure S3B**). We found that the projection  
239 associated with the 'fast' group were significantly higher for VIP interneurons located in parietal compared to  
240 those recorded in visual cortex (mean  $\Delta_{\text{Pta-V1}}=3.22$ , Mann-Whitney test,  $p=3.77 \cdot 10^{-9}$ ), while the opposite was  
241 observed for the projection associated with the 'slow' group (mean  $\Delta_{\text{Pta-V1}}=-7.79$ ,  $p=3.77 \cdot 10^{-9}$ , **Figure S3B**).  
242 Finally, we took advantage of the 3D AO imaging to investigate the heterogeneity in the responses of VIP  
243 interneurons located at different depth of the cortex. We were able to detect some differences in the amplitude  
244 of the average responses for reward (**Figure S2E**,  $F=9.5$ ,  $p=0.002$ ). However, we did not observe any  
245 differences in the distribution of the different clusters across depth (**Figure 2G**,  $F=1.16$ ,  $p=0.36$ ).



246 The differences in average response dynamics from individual neurons could arise from inter-trial variability.  
247 To evaluate this potential heterogeneity in the single trial dynamics of VIP interneuron activity, we used tensor  
248 component analysis (TCA, **Figure 2H**). TCA allowed us to further characterize the trial identity-dependent  
249 dynamics of VIP interneuron activity. All recorded neurons from different sessions/cortical regions were  
250 grouped by keeping only the first 10 trials of each trial types (see Methods for additional information) We used  
251 nonnegative tensor decomposition and focused our analysis on rank 3 TCA as using higher rank showed signs  
252 of overfitting and did not improve the reconstruction error (22% for rank 3 vs 18% for rank 20). We found a  
253 latent temporal component that robustly separated hit and false alarm from miss and correct rejection trials (2<sup>nd</sup>  
254 component, **Figure 2H**,  $\text{mean}_{\text{miss\&CR}} \text{ vs } \text{mean}_{\text{hit\&FA}} = 0.02 \text{ vs } 0.2$ , Mann-Whitney test,  $p < 0.001$ ). The third latent  
255 temporal component showed a slower time course, with some reward specificity and was over-represented in  
256 neurons from the visual cortex ( $\text{mean}_{\text{SS,Mtr,Pta}} \text{ vs } \text{mean}_{\text{V1}} = 0.02 \text{ vs } 0.06$   $p < 0.001$ ).

## 257 Behavioral performance influences task-related VIP interneuron responses

258 Differences in individual animal performance of the discrimination task could also contribute to the  
259 heterogeneity in the activity of VIP interneurons. Hence we tested whether differences in hit rate influenced the  
260 response of VIP interneurons during various epochs. We observed a positive correlation between the hit rate  
261 and the magnitude of the cue response of VIP interneurons during hit trials ( $R = 0.62$ , **Figure S3D**). Using a  
262 simple linear regression model, we found that the hit rate was able to explain 39% of the variance of cue  
263 responses ( $R^2 = 39.0\%$   $p = 0.006$ ). For comparison, the cue response was not influenced by the location of VIP  
264 interneurons in the dorsal cortex ( $R^2 = 18.2\%$   $p = 0.41$ ).

## 265 Arousal modulation of reinforcement-mediated recruitment of VIP interneurons

266 Reward and punishment can induce changes in the arousal states of the animals, and the activity of VIP  
267 interneurons is known to be modulated by the arousal states (Fu et al., 2014; Garcia-Junco-Clemente et al.,  
268 2017; Reimer et al., 2014). Therefore we considered whether changes in arousal contributed to the recruitment  
269 of VIP interneurons by primary reinforcers. We monitored variations in pupil diameter as a proxy for assessing  
270 arousal states (Vinck et al., 2015). In this set of experiments, we restricted our measurements to somatosensory  
271 and motor cortices using 3D AO microscopy and to the auditory and the medial prefrontal cortex using fiber  
272 photometry as described above (**Figure 3A**).

273 Hit and false alarm trials were first split into two groups using the mean reinforcer-mediated pupil dilation for  
274 threshold (average changes in pupil size for the large and small pupil group: 14.38% vs. 2.81%; **Figure 3C**).  
275 Reinforcement delivery associated with bigger changes in pupil diameter led to a stronger recruitment of VIP  
276 interneurons in both the somatosensory (large vs. small pupil  $\Delta F/F$ : 40% vs 29%  $n = 26$ , t-test,  $p = 0.01$ ) and  
277 motor cortex (large vs. small pupil  $\Delta F/F$ : 28% vs 18%,  $n = 111$ ,  $P < 0.001$  **Figure 3D**). A comparable modulation  
278 of VIP interneuron activity upon reinforcer presentation was observed when trials were split based on baseline  
279 pupil diameter (see Supplemental Information and **Figure S4B**). The recruitment of VIP interneurons upon cue  
280 presentation only (i.e. Miss and CR trials, where trials were split using the mean cue-mediated pupil dilation for  
281 threshold) was similarly modulated by arousal (**Figure S4A**). The positive correlation between pupil size  
282 changes and reinforcer-related activity of VIP interneurons was also present at single cell level (median  
283 correlation coefficient 0.31). Interestingly, neurons with a strong correlation coefficient showed a slower activity  
284 profile of recruitment by reinforcers than those with a correlation coefficient below the median value (**Figure**  
285 **3B**)

286 Because VIP interneuron population had slower dynamics in medial prefrontal cortex than in auditory cortex,  
287 we hypothesize that the pupil size-dependent modulation of reward responses would be stronger in prefrontal

288  
289  
290  
291  
292  
293  
294

cortex than in auditory cortex. Reinforcer-mediated responses in medial prefrontal cortex were significantly larger in trials with greater changes in pupil diameter (large vs. small pupil  $\Delta F/F$ : 3.8% vs 1.4%,  $n=6$  mice,  $p=0.01$  **Figures 3E and S4C**). This pupil size dependent modulation was however absent in recordings of VIP interneurons in the ACx (large vs. small pupil  $\Delta F/F$ : 4.5% vs 3.2%,  $n=6$  mice,  $p=0.08$  in the ACx (**Figure S4A**). Similarly, to our single neuron measurements, arousal modulation was present at a population level in Miss and CR trials (**Figure S4A**) or when using the baseline pupil dilation as arousal index (**Figure S4B**).

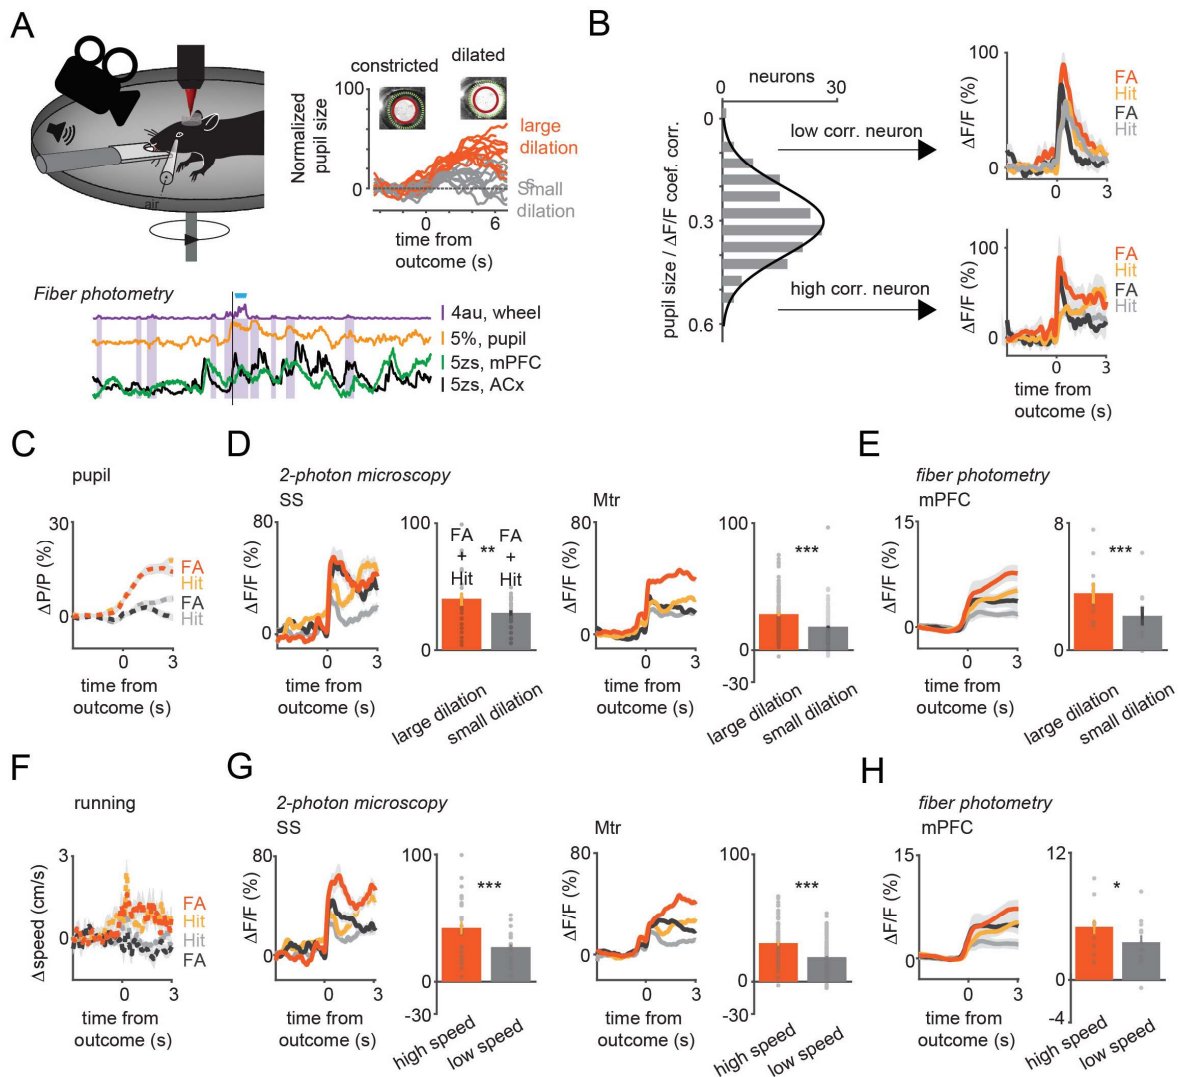

295  
296  
297  
298

**Figure 3. Arousal states modulate VIP neural responses to sensory cues and reinforcers.**

299  
300  
301  
302  
303  
304  
305  
306

**A)** Upper left, schematic of measurements. Pupil and movement were simultaneously monitored during 3D imaging in the auditory go-no-go task. Upper right, high (orange) and low (gray) arousal states were separated by changes in pupil diameter. Below, 60 sec continuous monitoring of different behavioral variables together with VIP interneuron population activity in ACx and mPFC. The black bar indicates the timing of an uncued reward delivery. Blue triangles indicate licking events. Purple shaded boxes represent running bouts.

**B)** Left, distribution of correlation coefficients of relative change in pupil diameter ( $\Delta P/P$ ) and VIP neuronal response. Right, reinforcement-associated responses were significantly larger when relative change in pupil

diameter ( $\Delta P/P$ ) was higher during the task. Red and orange indicate FA and Hit responses associated with higher  $\Delta P/P$ . FA and Hit responses associated with low  $\Delta P/P$  are in black and gray, respectively.

**C)** Average pupil dilation traces during high (red and orange) and low (black and gray) pupil changes for FA and Hit trials.

**D)** Population averages for Hit and FA during high and low pupil change in the SS and Mtr regions. Bars indicate average peak amplitudes (mean $\pm$ SEM, Hit and FA combined). Even in the late period, when the outcome responses were dissipated, larger changes in pupil diameter at the time of reinforcement were associated with higher VIP responses.

**E)** Same as D but for fiber photometry in the mPFC.

**F)** Same as C but for running speed.

**G)** Same as D but for running speed.

**H)** Same as E but for running speed. Higher relative change in the running speed was associated with larger neuronal responses recorded with 3D imaging or fiber photometry.

### Modulation of reinforcement-mediated recruitment of VIP interneurons by locomotion

We next examined how running behavior modulates VIP activity. Response profiles were split based on the median speed change during reward and air puff delivery (average speed for the fast and slow group 1.20 cm/s vs. -0.23 cm/s **Figure 3F**). Similar to what we observed with the pupil size, VIP interneuron responses to reward were stronger when the mice ran faster both for somatosensory (fast vs. slow running  $\Delta F/F$ : 42% vs 27% n=26, t-test,  $p<0.001$ ) and motor cortex-located interneurons (fast vs. slow running  $\Delta F/F$  30% vs 19%, n=86,  $p<0.001$ , **Figure 3G**). This difference was also found for sensory responses during Miss and CR (**Figure S4D**). Similar to the results of pupil modulation, we also observed that VIP interneuron population shows a stronger modulation by speed change in mPFC compared to ACx (fast vs. slow running mPFC,  $\Delta F/F$ : 5% vs 3.5%,  $p=0.02$ , ACx,  $\Delta F/F$ : 5.4% vs 4.1%,  $p=0.44$ , **Figures 3H and S4D**).

### VIP neurons in visual cortex are activated by sensory stimuli and reinforcers

VIP interneurons in auditory and visual cortices respond to sensory stimulation, albeit their responses are weakly tuned (Kerlin et al., 2010; Mesik et al., 2015; Pi et al., 2013). Therefore we next compared sensory- and reinforcement-evoked activity of VIP interneurons in visual cortex. In this set of experiments to ensure stimulus control we lightly anesthetized mice with isoflurane and imaged responses to drifting grating bars with different orientations. The vast majority of VIP interneurons (93.5%) responded to visual stimuli. We computed the orientation selectivity index (OSI) and direction selectivity index (DSI) of each VIP neuron (see methods). As previously reported (Kerlin et al., 2010; Mesik et al., 2015), VIP interneurons showed broad tuning with little or no preferred directions or orientation (OSI =  $0.17 \pm 0.01$ , DSI =  $0.16 \pm 0.01$ , **Figures 4C**) especially compared to pyramidal cells (OSI =  $0.63 \pm 0.01$ , t-test,  $p<0.001$ , DSI =  $0.34 \pm 0.01$ ,  $p<0.001$ ).

After measuring their visual response tuning, we imaged the same visual cortical neurons while mice performed the auditory discrimination task (**Figure 4A**). We found that 80.4% of VIP neurons were significantly activated by reward or punishment with a response magnitude comparable to their visual responses. However, the reinforcement responses were only weakly correlated with visual stimulus-evoked responses (Pearson's R value for reward: 0.16, for punishment: 0.23, and reward and punishment combined: 0.22; **Figures 4D and S5A**). Similarly, neither the orientation nor the direction selectivity index of the VIP neurons correlated with their reinforcement responses (Pearson's R value for OSI: 0.08, for DSI: 0.06; **Figure S5B**). This supports the hypothesis that the global recruitment of VIP interneurons by reinforcers arises independently of the local computation these neurons might be involved in.

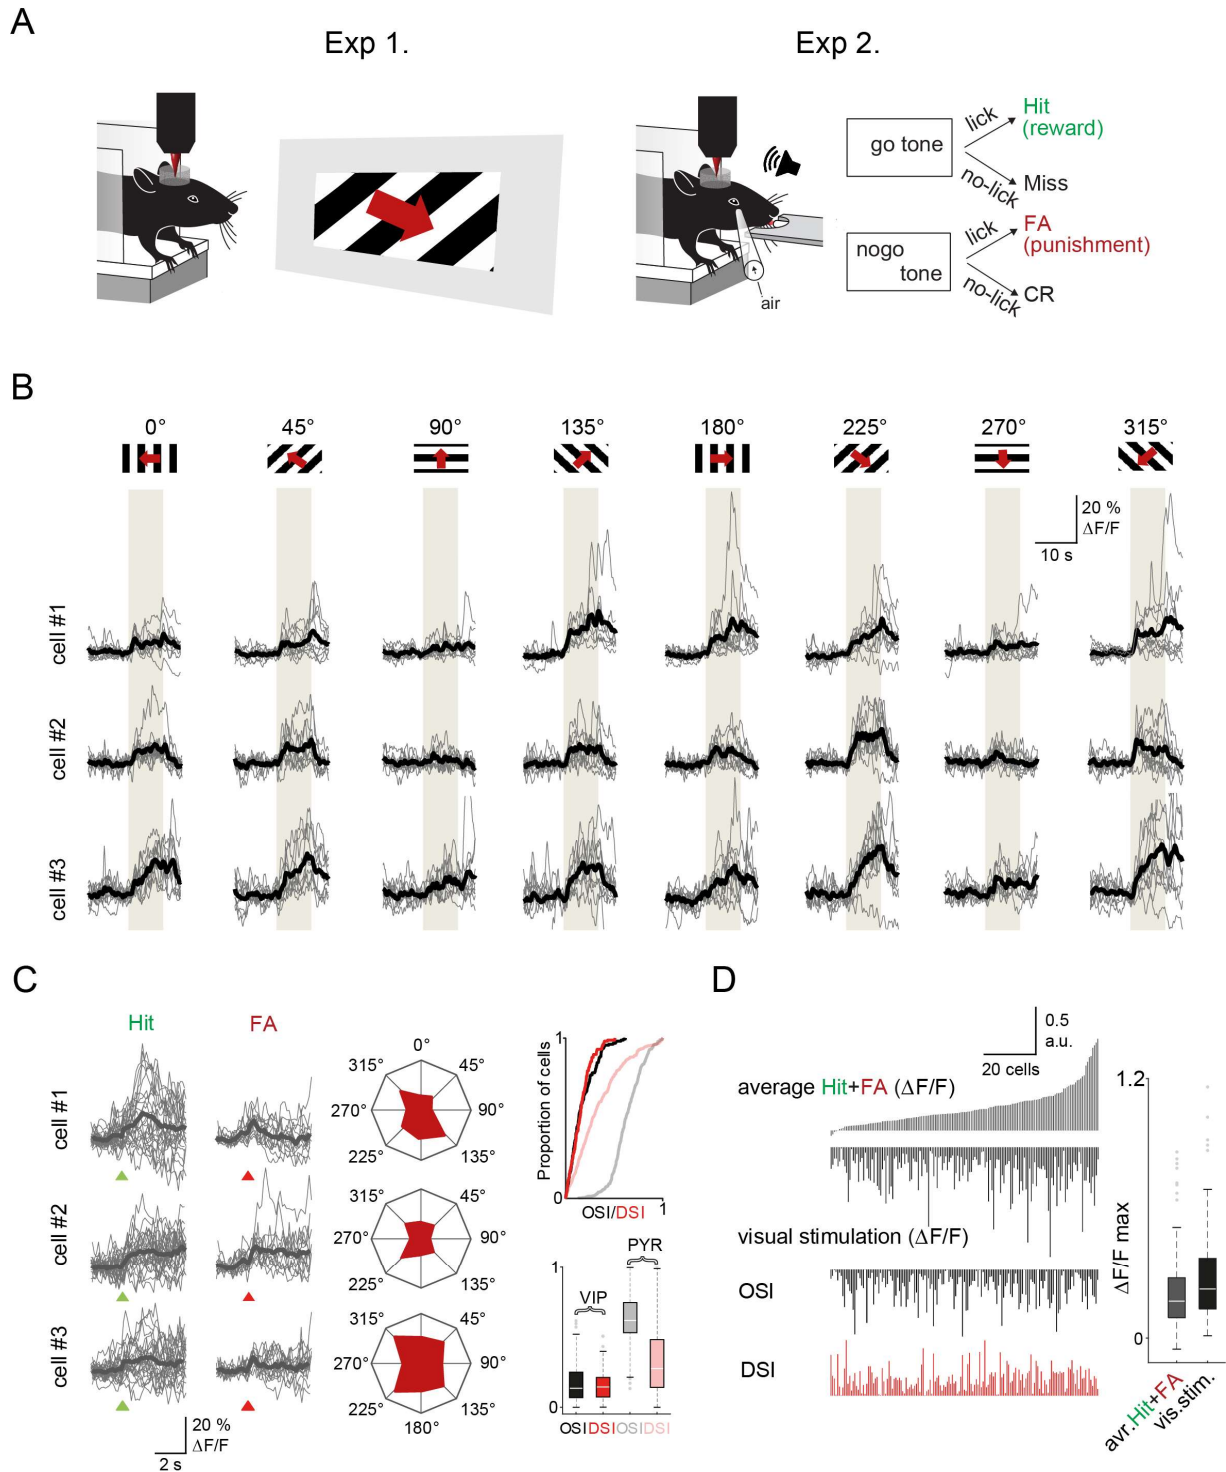

353

354

355

356

357

358

359

360

361

**Figure 4. Visual cortex VIP neurons respond to both visual stimuli and reinforcers**

**A)** Schematic of the measurement. Orientation tuning was mapped in a first set of experiments (Exp. 1) which was followed by recordings of the same neurons during the auditory go-no-go task (Exp. 2). Both set of recordings were performed using fast 3D AO imaging.

**B)** Individual  $\text{Ca}^{2+}$  responses from three different VIP interneurons to visual stimulation with moving grating in 8 different directions. The grey boxes indicate the duration of the visual stimulation.

362 **C)** *Left, responses of the same three cells to reinforcement. Middle, polar plots of neuronal responses to visual*  
363 *stimulation from the same neurons. Right top, cumulative distribution plot of OSI and DSI parameters of*  
364 *VIP (black and red) and pyramidal cells (gray and pastel red (VIP: n=157 cells, n=3 mice, pyramidal cells:*  
365 *n=383 cells, n=3 mice. Right bottom, OSI and DSI values of the same cells. Box-and-whisker plots show*  
366 *the median, 25th and 75th percentiles, range of nonoutliers and outliers.*

367 **D)** *Correlation between reinforcement and visual responses in the same VIP interneurons (n= 157). Each*  
368 *column refers to a single cell. From top to bottom: mean of the average Hit and FA responses, average*  
369 *visual responses, mean orientation selectivity index (OSI) and mean direction selectivity index (DSI). The*  
370 *cells were ordered according to the amplitude of the averaged reinforcement signal. Right, maximums of*  
371 *reinforcement-related and visual stimulation responses. Box-and-whisker plots show the median, 25th and*  
372 *75th percentiles, range of nonoutliers and outliers.*

## 374 DISCUSSION

375 Here we examined the rules of behavioral recruitment for VIP interneurons across cortex. By monitoring VIP  
376 neural activity across dozens of cortical regions we found that most neurons were strongly activated by water  
377 reward and air-puff punishment. This recruitment was boosted during high arousal states as previously  
378 observed for other sensory-mediated processes (Fu et al., 2014; Garcia-Junco-Clemente et al., 2017; Reimer  
379 et al., 2014). In visual cortex VIP interneurons also showed sensory tuning to visual gratings. This tuning was  
380 however not predictive of the VIP interneuron responses to reinforcers demonstrating the co-existence of both  
381 local and global modes for the recruitment of VIP interneurons.

382 VIP interneurons represent a small and sparsely distributed population across cortex rendering their  
383 investigation challenging. We aimed at simultaneously monitor, in behaving mice, the activity of a large  
384 population of these neurons and this across dorsal cortex. This was made possible by the use of 3D acousto-  
385 optical two-photon microscopy. The chessboard scanning method of 3D AO microscopy provided additional  
386 advantages to our ability to measure the spatial and temporal dynamics of VIP interneuron activity. According  
387 to our calculation this method leads to a several orders of magnitude increase in the measurement speed and  
388 signal to noise ratio compared to piezo-based volume scanning (**Table S1**). Further, it enabled robust off-line  
389 motion correction during behavioral experiments owing to the ability to actively extend the recordings beyond  
390 the soma of the neurons, thereby preserving fluorescence information during motion (Reid et al., 2016). Due to  
391 this large improvement in the SNR and recording speed (**Table S1**), we were able to dramatically increase the  
392 number of simultaneously recorded neurons while maintaining a high sensitivity of detection of neuronal activity.  
393 This allowed us to demonstrate that VIP interneurons, throughout cortex and across cortical layers, responded  
394 homogeneously and synchronously to reward and punishment delivery.

395  
396 This finding seemingly contradicts previous reports of muted VIP interneurons reinforcement responses in  
397 similar goal directed tasks (Khan et al., 2018, Sachidhanandam et al., 2016). Those studies however used over  
398 trained animals for which little to no punishment was delivered and reward delivery was fully predictable. One  
399 study limited to the amygdala indeed showed that reinforcement recruits VIP neurons in a time limited manner  
400 (Krabbe et al 2019).

401 Our observations also revealed heterogeneity in VIP interneurons: their temporal response profiles to  
402 reinforcers, sensory tuning and arousal modulation showed differences. In addition to the single trial and  
403 individual neuronal variability in the dynamics of reinforcer related activity revealed by principal and tensor  
404 component analyses, we identified variability in behavioral performance as a source of heterogeneity in the  
405 cue-mediated recruitment of VIP interneurons (**Figure S3D**). We also investigated potential response  
406 heterogeneity across cortical regions in the reinforcement-mediated response of VIP interneurons. For instance,  
407 VIP interneuron population showed a faster recruitment by reward in ACx than their counterpart in mPFC

408 **(Figures 2A, 3E and S4A)**. Rapidly activated neurons were absent from visual cortical area whereas they could  
409 be observed throughout the rest of the dorsal cortex (**Figure 2G**). This variability might partially reflect different  
410 VIP interneuron subtypes (Pfeffer et al., 2013; Pi et al., 2013; Pronneke et al., 2015). Perhaps the most distinct  
411 subclass of VIP interneurons is cholecystokinin- (CCK+) expressing interneurons with basket cell-type  
412 morphology (He et al., 2016). These cells provide somatic inhibition in the hippocampus. We expect that the  
413 majority of the neurons we recorded in the upper layers are calretinin- (CR+) expressing bipolar cells, including  
414 intrinsic cholinergic acetyltransferase- (ChAT+) positive neurons (Kim et al., 2017). This separation into CCK-,  
415 CR- or ChAT-expressing VIP interneurons has been recently partially validated using single-cell transcriptomic  
416 analysis (Tasic et al., 2016; Zeisel et al., 2018). Given the high proportion of VIP neurons responding to reward  
417 and punishment, it seems likely that multiple subtypes of VIP interneurons respond to reinforcers. Further  
418 studies using inter-sectional targeting strategies will be required to provide insight into the potential cell-type-  
419 specific origins response of heterogeneity we observed.

420 The response heterogeneity of the local mode of VIP interneurons had already been appreciated for sensory  
421 stimuli. When local activation is examined in terms of tuning, VIP interneurons are significantly more  
422 heterogeneous and broadly tuned than principal neurons, as previously shown in the auditory and visual  
423 cortices (Mesik et al., 2015; Pi et al., 2013). Indeed, we found that VIP interneurons respond with a low  
424 selectivity for drifting grating visual stimuli. There was only a weak positive correlation between the  
425 reinforcement-related and the visual stimulus-driven responses. This small correlation could reflect differences  
426 in excitability, but more importantly indicates that VIPs can play in both leagues: in region-specific sensory  
427 processing and in transmitting global signals to local microcircuits. This further suggests the absence of distinct  
428 populations specializing only in global or in local processing.

429 We also observed arousal-modulation of VIP interneuron activity in motor, somatosensory and medial prefrontal  
430 cortices, consistent with the previous reports in visual and pre-motor areas (Fu et al., 2014; Garcia-Junco-  
431 Clemente et al., 2017; Jackson et al., 2016; Reimer et al., 2014). Arousal states are usually measured by  
432 changes in pupil diameter or running speed. One caveat of comparing reinforcement-evoked responses to  
433 arousal modulation is that the delivery of water reward and air puff punishment also drives additional changes  
434 in arousal, leading to pupil dilation and/or locomotion. Nevertheless, we found that VIP interneuron recruitment  
435 by reinforcers was correlated with pupil dilation, similar to the previously documented arousal-modulation (Fu  
436 et al., 2014; Garcia-Junco-Clemente et al., 2017; Jackson et al., 2016; Reimer et al., 2014). However, only the  
437 late response phase showed a correlation with the pupil size, whereas the initial, transient phase followed more  
438 closely the reinforcer delivery. This arousal modulation was surprisingly muted in auditory cortex during reward  
439 delivery. This could thereby explain the striking different kinetics observed in simultaneous mPFC and ACx  
440 photometry measurements. Additionally, our behavioral paradigm did not encourage mice to run and their small  
441 movements produced only weak modulation in VIP activity (**Figure 3**). Overall, these observations lead us to  
442 conclude that changes in arousal alone cannot explain the recruitment of VIP interneurons upon reward or  
443 punishment.

444 The circuit basis of the global signal is not yet known, although neuromodulatory systems are prime candidates,  
445 in particular, the forebrain cholinergic system. Indeed, central cholinergic neurons convey rapid reinforcement  
446 responses to cortex (Hangya et al., 2015) and a type of layer 1 inhibitory neuron is activated by punishment  
447 through a nicotinic mechanism (Letzkus et al., 2011). VIP neurons express fast, ionotropic nicotinic receptors  
448 and can be activated by acetylcholine in vitro (Alitto and Dan, 2012; Chen et al., 2015). Optogenetic cholinergic  
449 stimulation can also depolarize the membrane potential of VIP neurons in vivo (Gasselin et al., 2021). However,  
450 it remains unclear how this putative reinforcer-mediated cholinergic signaling would be ultimately integrated  
451 within cortex as multiple inhibitory neurons types other than VIP interneurons are known to respond to  
452 acetylcholine as well (Kuchibhotla et al., 2017). Another possibility is that the serotonergic system could convey  
453 this reinforcement signals (Cohen et al., 2015). Indeed, many (but not all) VIP neurons express 5HT3A, the

454 ionotropic serotonin receptor and could thereby be a specific recipient for such information (Tasic et al., 2016;  
455 Zeisel et al., 2018).

456 At a functional level, reinforcer-induced activation of VIP interneurons is likely to produce disinhibition (Lee et  
457 al., 2013; Pi et al., 2013) and thereby gain modulation (Pi et al., 2013) through changing the balance of inhibition  
458 across the somato-dendritic axis (Pfeffer et al., 2013). This could then represent a circuit-level explanation for  
459 the broad recruitment of dendrites observed during reinforcement (Lacefield et al., 2019). At the dendritic level,  
460 disinhibition is known to favor dendritic spikes that will boost neural responses (Larkum et al., 2009; Lavzin et  
461 al., 2012; Palmer et al., 2014; Smith et al., 2013). This would support the role of VIP neurons in circuit plasticity  
462 in visual cortex (Fu et al., 2015) and hippocampus (Donato et al., 2013). Hence, VIP interneurons-mediated  
463 disinhibition provides a compelling basis for how global reinforcers could impact local cortical computations and  
464 drive learning.

465 In summary, the global activation mode of VIP cells could serve to gate dendritic plasticity cortex-wide and  
466 potentially associate distant neuronal assemblies that are active at the moment of reinforcement to link  
467 information about the internal and external worlds. In other words, the VIP-mediated feedback signaling may  
468 provide the required global learning signal to strengthen the reinforcement-related functional connectivity of  
469 cortical representations. In this way, VIP neurons may transiently boost the gain on learning, similar to the  
470 different phases of learning in deep networks in artificial intelligences (Guerguiev et al., 2017).

471

472  
473  
474  
475  
476  
477  
478  
479  
480  
481  
482  
483  
484  
485  
486  
487  
488  
489  
490  
491  
492  
493  
494  
495  
496  
497  
498  
499  
500  
501  
502  
503  
504  
505  
506  
507  
508  
509  
510  
511  
512  
513  
514  
515  
516  
517  
518  
519

## **MATERIALS and METHODS**

### ***Animals***

All experimental procedures were carried out following the guidelines of the Animal Care and Experimentation Committee of the Institute of Experimental Medicine of the Hungarian Academy of Sciences, and the Cold Spring Harbor Laboratory Institutional Animal Care and Use Committee, in accordance with the Hungarian, EU, and National Institutes of Health regulations. We used male and female adult (6-24-week-old) VIP-Cre, PV-Cre and Thy-1-Cre mice housed in small groups of 2-4 under controlled temperature and humidity conditions. They were kept on a reverse light cycle, and during the training and the experimental period the water consumption of the VIP-Cre mice was restricted to 1 ml/day after recovering from surgery. The mice had ad libitum access to food.

### ***In vivo imaging***

Animals were anesthetized using a cocktail of fentanyl, midazolam, and medetomidine (0.05 mg, 5 mg, and 0.5 mg/kg, respectively). Ropivacaine 0.2 % was administered subcutaneously over the skull prior to the incision. After removing the skin over the top of the skull, which was then thoroughly cleaned and dried, a round craniotomy was performed using a 3 mm diameter biopsy punch and a dental drill. After the bleeding had been stopped, a double coverslip was implanted over the cranial window and fixed using a mixture of cyanoacrylate glue (Loctite Superbond) and luting cement (3M ESPE RelyX). Finally, a metal headbar was cemented to the skull using dental cement (C&B Superbond). The 3 mm diameter cranial window was positioned according to two main aspects. We centered the craniotomy on the injection site, except in motor and visual areas, where this would have resulted in transecting the sutures, which would have caused larger motion artefacts and severe bleeding from venous sinuses. During the procedure, the mice were head-fixed and laid on a heating pad to maintain stable body temperature. After the operation, the mice were woken up using a mixture containing nexodal, revertor, and flumazenil (1.2 mg, 2.5 mg and 2.5 mg/kg body weight, respectively), and put on another heating pad where they stayed until recovered enough to be finally put back in their home cages. Post-operative care consisted of a daily intraperitoneal carprofen injection (0.5 mg/ml, 500  $\mu$ l) for up to 5 days, and subcutaneous Ringer lactate injection (0.1-0.15 ml) to prevent dehydration. The cranial window implantation was usually performed 2 weeks after the virus injection. Injection sites of the 18 dorsal cortical regions from 16 mice were defined on the basis of coordinates from the Allen and Paxinos brain atlases (**Figure 2A**). In the visual cortex, the correct location was further confirmed by recording the responses of the cells to visual stimulation. Post hoc histology was performed in early experiments to ensure our bregma coordinates matched the Paxinos atlas. Each region was then recorded one time per animal.

### ***Viral injection***

Anaesthesia and post-operative care were executed as above. A small, approximately 0.5 mm diameter craniotomy was performed with a dental drill. 200-300 nl AAV9.Syn.Flex.GCaMP6f.WPRE.SV40 (Penn Vector Core) was injected using a borosilicate pipette at 350  $\mu$ m depth into different cortical areas for two-photon imaging. The speed of the injection was 15-20 nl/s, and there was a 10 minute period between the end of the injection and the removal of the pipette to prevent leakage. We injected one to two areas per animal.

### ***Optical fiber implantation***



520 Animals were anesthetized using isoflurane (1l/min O<sub>2</sub> – 0.8% isoflurane) and placed in a stereotaxic  
521 apparatus. A small craniotomy was performed using a dental drill above the left ACx (2.50 mm posterior to the  
522 bregma and 4 mm lateral to the midline) and the right mPFC (1.75 mm anterior to bregma and 0.5 mm lateral  
523 to midline). 200 nl of AAV9.Syn.Flex.GCaMP6f.WPRE.SV40 (Penn Vector Core) was then injected at a rate of  
524 50nl/min into the ACx (1.2 mm deep) and in the mPFC (1.5 mm deep). The fiber optic cannulas (400 μm,  
525 0.48NA, Doric lenses) were inserted 0.4 mm above the injection sites for both locations and sealed in place  
526 using Metabond, Vitrebond and dental acrylic. Behavioral training and physiological recordings were started at  
527 least 2 weeks after surgery to allow mice to recover and the fiber to clear.

528

### 529 ***Data collection using fiber photometry***

530

531 Fiber photometry data were collected and analyzed using a custom-made photometry set up and Matlab-based  
532 software. We used a 470nm LED source (M470F3, Thorlabs) coupled to an optic fiber (M75L01) and collimation  
533 lens (F240FC-A) for GCaMP6f excitation. The 470 nm excitation light was delivered to the cannula implanted  
534 on the head animal using a second collimation lens (F240FC-A) coupled to a 400 μm, high NA, low  
535 autofluorescence optic fiber (FP400URT, custom made, Thorlabs). The emission light was collected using the  
536 same optic fiber and directed to a Newport 2151 photoreceiver using a focusing lens (ACL2541U-A, Thorlabs).  
537 Excitation (ET470/24M) and emission (ET525/50) filters, and a dichroic mirror (T495LPXR) were from Chroma  
538 Technology. The 470nm excitation light was amplitude-modulated at a frequency of 211 Hz, with a max power  
539 of 40uW, using an LED driver (LEDD1B) controlled through a National Instrument DAQ (NI USB-6341). The  
540 modulated data acquired from the photoreceiver were decoded as in Lerner et al., 2015 using a custom Matlab  
541 function (available at <https://github.com/QuentinNeuro/Bpod-FunctionQC>).

542

### 543 ***Auditory discrimination task***

544

545 Mice were kept on a limited access water schedule for behavioral experiments. They had to lick when they  
546 heard a go tone (frequency: 5 kHz complex tones for sessions with two-photon recordings, 3kHz pure tones for  
547 sessions with photometry recordings, duration: 0.5 s) to get small water droplets (5 μl) as a reward, and avoid  
548 licking after hearing a no-go tone (frequency: 0.5 kHz complex tones for sessions with two-photon recordings,  
549 20kHz pure tones for sessions with photometry recordings, duration: 0.5 s) which was associated with a 100  
550 ms-long mild air puff aimed into the eye. Reinforcement came 0.5 s after it was triggered. The intensity of the  
551 air puff was set to yield a blink response. In some experiments, we introduced two additional stimuli that were  
552 less easy to discriminate (8 kHz for go and 10 kHz for no-go tones). The addition of these cues did not reveal  
553 any significant differences in GCaMP6f signals in VIP neurons, therefore these trial types were combined as  
554 go and no-go stimuli for further analysis. Licking was detected using a custom-made infrared sensor. Behavioral  
555 data were acquired using a Bpod device, and the tones were generated using a PulsePal device (Sanders and  
556 Kepecs, 2014) and Logitech speakers. In one set of experiments we measured how pupil dilation changed  
557 during behavior. A 4× objective was attached to a CMOS camera (Basler puA 1600-60 μm) to record pupil  
558 diameter and eye movements. In another set of experiments we recorded running speed: mice were head-fixed  
559 over a rotating plastic plate allowing them to run freely. The rotation speed of the dial was recorded by an optical  
560 mouse (Urage reaper 3090, Hama) mounted upside down on the lower side of the plate.

561

### 562 ***3D AO microscopy***

563

564 The improved microscope is designed and constructed based on the previous system reported earlier (see  
565 Figure S1 in (Szalay et al., 2016)). Briefly, short pulses were delivered by a femtosecond laser (Mai Tai, Spectra  
566 Physics). The coherent backreflection was eliminated by a Faraday isolator (BB9-5I, EOT). Thermal drift errors  
567 of optical elements were compensated for by an automatic beam-stabilization unit (BeamStab, Femtonics). The

568 temporal dispersion was compensated for by a motorized four-prism sequence that could be automatically  
569 tuned in the 720-1100 nm wavelength range to provide the required large, negative, second- (up to 100,000  
570 fs<sup>2</sup>) and third-order (up to 45,000 fs<sup>3</sup>) dispersion compensation (4DBCUs, Femtonics). The 4DBCUs unit was fine-  
571 tuned to provide the best image contrast and SNR at each wavelength in the depth. The first two water-cooled  
572 AO deflectors were filled with chirped acoustic waves whose frequencies form two orthogonal electric cylinder  
573 lenses (AO z-focusing unit). The second group of AO deflectors, with 15 mm clear optical aperture (Gooch and  
574 Housego), did the majority of lateral scanning and also compensated for the longitudinal and lateral drift of the  
575 focal spot in cooperation with the first two deflectors according to equations S1-S70 published earlier (Reid et  
576 al., 2016). These two groups of deflectors were coupled together by a telecentric relay system (using two  
577 achromat lenses, #47-318, Edmund Optics) which contained a half wave plate (AHWP10M-980, Thorlabs) to  
578 set the optimal polarization for maximal diffraction efficiency. There is a one-to-one relationship (a bijection)  
579 between non-linear radiofrequency signals and the position, speed, and direction of the moving focus spot (see  
580 Equations S1-S70 and Table S1 in (Szalay et al., 2016)). We used these quadratic equations to change the  
581 frequency of the sine wave drive to generate multiple 3D drifts from any arbitrary position at any desired speed.  
582 In this way, multiple small frames were generated (3D chessboard scanning) around each VIP cell from 10-25  
583 lines. Therefore, not only the somatic signal but also the surrounding background information was detected:  
584 this enabled the somatic fluorescent signals to be preserved, even during brain movement, for off-line motion  
585 artefact compensation. A second telecentric relay system consisting of two achromat lenses (#47-319, Edmund  
586 Optics, G322246525, Linos) focused the diffracted light beams onto the back aperture of the objective. The  
587 back-reflected fluorescence signal was separated from the excitation beam by a long-pass dichroic with a cut-  
588 on wavelength of 700 nm (700dcrxu, Chroma Technology). Red and green channels were split using a long-  
589 pass dichroic at 600 nm (t600lpxr, Chroma Technology). The absorption filters for green and red fluorescence  
590 was centered to 520 ±30 nm and 650±50 nm, respectively (ET520/60m, ET650/100m, Chroma Technology).  
591 Two extra infrared filters (ET700sp-2p8, Chroma Technology) blocked the back-scattered excitation beam from  
592 the GaAsP photomultiplier (H10770PA-40, Hamamatsu). The entire detector assembly was fixed to the  
593 objective and moved together during setting the nominal focal plane for the 3D AO imaging to minimize the  
594 detection pathway and maximize photon collection efficiency. A 20× objective (XLUMPlanFI20×/1.0, water  
595 immersion, Olympus) with a 1.0 numerical aperture was used.

596

### 597 **Recording sparsely-labelled networks in 3D with AO scanning**

598

599 The main advantage of 3D AO microscopy is that the entire measurement time can be restricted to the required  
600 ROIs: this can result in a 10<sup>7</sup>-fold increase in the product of SNR<sup>2</sup> and the measurement speed (see Equations  
601 S82-S85 in (Szalay et al., 2016)). Therefore with each frame of the chessboard scanning method we only  
602 needed to record less than 5% of each VIP cell to preserve the fluorescence information for motion correction  
603 (Szalay et al., 2016). From these two parameters (and using Equations S82 and S84 from (Szalay et al., 2016))  
604 we can calculate the increase in measurement speed and SNR for 3D chessboard scanning as follows:

605

$$(SNR_{gain})^2 * v_{gain} = \frac{V_{total}}{\sum_{i=1}^{N_{ROI}} V_i} > \frac{1}{1\% * 2\%} \sim 5000, \text{ Equation S1}$$

606

607 where  $v_{gain}$  and  $SNR_{gain}$  are the relative gains in measurement speed and SNR, respectively,  $N_{ROI}$  is the total  
608 number of ROIs,  $V_i$  is the volume of region number  $i$ , and  $V_{total}$  is the total scanning volume. This means that  
609 we can get over 5000-fold increase in SNR<sup>2</sup> or in the measurement speed (or even in the product of both) when  
AO-based 3D ROI scanning is used instead of point-by-point volume scanning.

610

611 To calculate this comparison more quantitatively, we compared 3D chessboard scanning with point-by-point  
612 scanning, volume scanning, and multi-layer imaging when AO scanning or resonant scanning with fast piezo z  
drive were used (see **Table S1**). We limited our comparison to these point scanning methods because they

613 allow whole-field detection and, therefore, deep penetration in vivo. We recorded 120 VIP cells in a  $689 \mu\text{m} \times$   
614  $639 \mu\text{m} \times 580 \mu\text{m}$  volume with  $548 \times 507 \times 193$  pixel resolution using 3D chessboard scanning (**Figure 1A**).  
615 The 3D chessboard scanning method could image the 120 chessboards at 27.7 Hz (**Figure 1A, Table S1**).  
616 However, the measurement speed was only 0.00062 Hz when the same 120 neurons were recorded using  
617 point-by-point volume scanning when using the same, relatively long, pixel dwell time (30  $\mu\text{s}$ ). This means a  
618 44762-fold lower measurement speed. We saw a smaller reduction in measurement speed when we compared  
619 chessboard scanning with resonant scanning. The highest speed of the currently available resonant scanners  
620 is about 16 kHz, corresponding to  $\sim 0.1 \mu\text{s}$  ( $= 1 / 16 \text{ kHz} / 548 \text{ pixel}$ ) pixel dwell time which results in a 0.16 Hz  
621 volume-scanning speed (**Table S1**) which is too slow to resolve  $\text{Ca}^{2+}$  responses. Moreover, as the pixel dwell  
622 time is 243-fold lower we would collect less signal from one pixel, resulting in a 41506-fold decrease in the  
623 product of  $\text{SNR}^2$  and measurement speed (**Table S1**). We could accelerate measurement speed by restricting  
624 the numbers of the recorded z layers to 19 because VIP neurons were present only in 19 z-layers in the  
625 exemplified measurement. However, in this case, we also needed to add about 20 ms setting time for each z  
626 layer because the long-range z drives required higher setting times according to the specifications of the piezo-  
627 actuators (see for example, <https://www.physikinstrumente.com>). This resulted in a measurement speed of  $\sim 1$   
628 Hz and in 6654-fold decrease in the product of  $\text{SNR}^2$  and measurement speed when compared to 3D  
629 chessboard scanning (**Table S1**). The increased SNR of the 3D chessboard scanning allowed the reduction of  
630 the laser intensity which resulted in lower phototoxicity according to the LOTOS (low-power temporal  
631 oversampling strategy (Chen et al., 2012)). The LOTOS-based multi-photon imaging is one of the main  
632 advantages of AO scanning and provides long lasting imaging in chronic behavior experiments.

633 During these comparisons we did not consider two important technical factors in our calculations. First:  
634 the gain in SNR was calculated only for a single pixel (which is a volume element in space, therefore we can  
635 name it as voxel). However, both 3D chessboard scanning and volume scanning capture multiple voxels from  
636 a single VIP neuron (in our measurements for chessboard scanning:  $105.2 \pm 0.4$  voxels/neuron and for volume  
637 scanning:  $338.5 \pm 0.1$  voxels/neuron). Therefore, in a more precise calculation we need to divide the  
638 improvement shown Table S1 for chessboard scanning with the ratio of 338/105.

639 Second: piezo actuators and resonant scanners are mechanically never perfectly balanced and are also  
640 sensitive to local mechanical vibrations and thermal turbulences which results in tumbling, wobbling, and jitter  
641 in the laser scans. These mechanical effects are difficult to precisely quantify into fluorescence changes  
642 although they would compensate the first factor. Therefore, for simplicity of calculation, both factors were  
643 ignored in our calculations.

644 Random-access targeting of regions of interest by AO scanning is useful not only in 3D but also in two-  
645 dimension (2D). Because the ratio of the VIP cells in the cortex is about  $< 1\%$  we can estimate the increase in  
646 measurement speed and SNR in 2D as follows:

647 
$$(\text{SNR}_{\text{gain}})^2 * v_{\text{gain}} = \frac{A_{\text{total}}}{\sum_{i=1}^{N_{\text{ROI}}} A_i} \sim 100, \text{ Equation S2}$$

648

## 649 **Visual stimulation**

650

651 An LCD monitor was placed at a distance of 20 cm from the contralateral eye of the mouse, spanning  $100^\circ \times$   
652  $70^\circ$  of the visual field. The objective was covered with a black rubber shield to prevent stray light entering  
653 through the gap between the animal's head and the objective. A visual stimuli protocol written in Matlab using  
654 the 'Psychtoolbox' package. The protocol consisted of eight differentially directed gratings with an angular  
655 interval of  $45^\circ$ . At the beginning of each trial, a gray screen was presented for 20s. After that, a grating appeared  
656 and remained still for 1 s, and then moved orthogonally to its orientation for 6 s at 1 cyc/s speed, then it stayed

657 still for 1 s, and finally the grey screen reappeared again. Gratings were repeated 10-20 times per direction in  
658 pseudorandom order. Pyramidal cell data were obtained from Thy-1-Cre mice.

659

### 660 ***Two-photon imaging data analysis***

661

662 Motion correction, selection of ROIs corresponding to VIP cells on the frames of 3D chessboard scanning,  
663 background calculation,  $\Delta F/F$  calculation, filtering and data visualization was performed using the MES data  
664 acquisition software written in Matlab and C++ (Femtonics). Motion correction, if necessary, was conducted  
665 with a custom-written offline motion correction algorithm (see Off-line motion corrections section), and  
666 remaining artefacts were interpolated or smoothed with partial Gauss filtering under visual control.

667 For the trial-to-trial analysis we considered a neuron in a given trial as active if the difference between the peak  
668  $\Delta F/F$  value of reinforcer delivery epoch (0-2 sec interval after reinforcement onset) and mean  $\Delta F/F$  value of  
669 baseline epoch (-2-0 sec interval before tone onset) was higher than 2 standard deviations (SD). Peak  $\Delta F/F$   
670 value was defined here as the average  $\Delta F/F$  value of the datapoints around the peak in the range of 250 ms.  
671 The results presented in **Figure S2** used two SD as a cutoff. We defined synchronicity as the number of active  
672 neurons divided by the total number of all neurons in a given a trial, i.e. how many neurons are activated  
673 simultaneously. Reliability was calculated as the number of active trials divided by the total number of trials, i.e.  
674 how reliably the neuron is activated in Hit and FA trials.

675 We used linear regression models to address heterogeneity of the cue responses (**Figures 2A, S3D**). The  
676 explanatory variable for the first model was the hit rate (number of hit trials divided by the number of go trials)  
677 to characterize behavior. The dependent variable was the relative size of the average cue response compared  
678 to the average reinforcement response as a reference. The values were calculated on the population average  
679 traces of the hit trials from each measurement. In the second model we used categorical variables with dummy  
680 coding for 4 functional regions (motor, sensory, parietal, visual) as explanatory variables to describe regional  
681 differences. The regression was fitted using ordinary least squares method of Statsmodels package in Python  
682 3 based Anaconda data science platform.

683 The clustering analysis (**Figures 2F-G, S3A-B**) was done using a custom Matlab routine. Positive somatic  $\text{Ca}^{2+}$   
684 responses recorded during hit trials were extracted. Data were z-scored using the mean and variance of  
685 fluorescence during the first second of recording. We furthered normalized using the maximal amplitude of the  
686 response calculated during the period from 0 to 4s after reward delivery. We applied a dimensionality reduction  
687 along the time axis using a principal component analysis on the period from 0 to 4s after reward delivery. We  
688 then considered only the first 4 principal components (PCs) explaining 90% of the data for clustering purposes.  
689 K-means clustering with 5 replicates was used to cluster into 5 types the PCs of the responses of VIP  
690 interneurons.

691 We applied Tensor Component Analysis (TCA) (Kolda and Bader, 2009; Williams et al., 2018) on somatic  $\text{Ca}^{2+}$   
692 responses recorded during the discrimination task. After smoothing, single trial neural activities corresponding  
693 to the reaction time periods for hit and FA trials were time-wrapped to a fixed 1.5 sec / 30 data points in length.  
694 All recordings were rendered non-negative by subtracting the minimal fluorescent  $\text{DF}/F$  value for each cells.  
695 Data were finally normalized by dividing by the average maximum fluorescent  $\Delta F/F$  value of Hit-only trials. Only  
696 the first 10 trials of each types were then selected for each cell and each session and assembled in a  $N \times T \times K$   
697 matrice where  $N=771$  neurons,  $T$ : time (s),  $K=40$  trials. TCA reconstruction error was computed with different  
698 latent numbers [1,2,3,4,5,10,15,20] with 10 different initial conditions for each latent number. Using 3 latents  
699 lead to a reconstruction error of 21%.

### 700 ***Pupil diameter***

701

702 The video recorded with the camera was first thresholded to isolate the pupil on the image. The pupil area was  
703 fitted to an ellipse, and the main diagonal was extracted. Missing frames caused by spontaneous or air puff-  
704 triggered blinking were interpolated manually. A Gaussian filter was applied to smooth eye movement-related  
705 artefacts. In analyzing the change of pupil diameter, the traces were normalized to  $\Delta P/P = (P(t)-P_0)/P_0$  using a  
706 two second period before tone onset as baseline ( $P_0$ ). Trials of each outcome were separated to high- and low-  
707 arousal groups on the basis of the change in the pupil diameter. The area under the pupil diameter curve was  
708 calculated in the 0-3 sec interval after reinforcement onset, and the median value was selected. If the area  
709 under the curve value of a given trial was higher or lower than the median value, it was considered to be high-  
710 or low-arousal trial, respectively. For baseline pupil analysis, when we compared the VIP cell activity after  
711 reinforcement associated with low and high baseline arousal levels, the trials were again separated into low-  
712 and high-arousal trials, but here, the basis of the separation was the area under the pupil diameter curves in  
713 the [-2;0] sec interval before the tone onset.

714

### 715 ***Locomotion velocity analysis***

716

717 Velocity traces were first Gauss filtered. In Hit and FA trials, we defined the change in the running speed as the  
718 speed difference between the reinforcer delivery time period (0-2 sec interval after reinforcement onset) and  
719 baseline time period (-2-0 sec interval before tone onset). In Miss and CR trials, the speed difference was  
720 calculated between the tone delivery time period (0-2 sec interval after tone onset) and baseline time period (-  
721 2-0 sec interval before tone onset). Trials were separated into low and high speed change groups according to  
722 the median speed change value.

723

### 724 ***Visual stimulation***

725

726 Orientation and direction selectivity indexes were calculated as  $OSI = (R_{pref} - R_{ortho})/(R_{pref} + R_{ortho})$ , and  $DSI =$   
727  $(R_{pref} - R_{opp})/(R_{pref} + R_{opp})$  (Schumacher et al., 2019), where  $R_{pref}$  denotes the amplitude of the response to the  
728 preferred orientation (OSI) or direction (DSI),  $R_{ortho}$  denotes the response to the orthogonal orientation in the  
729 OSI formula, and  $R_{opp}$  refers to the response to the direction that is opposite to the preferred one.

730

### 731 ***Statistical analysis***

732

733 For all analyses, the activation/suppression period was set to be 0-2 sec after stimulus onset: the statistical  
734 significance of the change of  $Ca^{2+}$  responses was then evaluated and compared to a stimulus-free baseline (-  
735 2-0 sec before stimulus onset). The statistical significance of the activation and suppression was determined  
736 by a P value cutoff of 0.05. First, the mean baseline values of each trial were subtracted from each  $Ca^{2+}$  trace  
737 in order to directly compare the effect of stimuli on  $Ca^{2+}$  responses and minimize the effect of unknown sources  
738 of noise. Lilliefors normality test was used to evaluate whether the  $Ca^{2+}$  signals of individual VIP neurons  
739 followed a normal distribution. The Lilliefors test showed that 76% of VIP neurons (Hit: 70%, FA: 82%) followed  
740 a normal distribution. The fraction of the neurons activated by reinforcers (see below) with normal distribution  
741 (91%) was similar to that of activated neurons with non-normal distribution. Therefore, we used a one-tailed  
742 one sample t-test to classify the activation and suppression (see Supplemental Information for a more sensitive  
743 analytical method). Neurons were classified as responsive when either activation or suppression was  
744 statistically significant. Student's t-test ( $*p < 0.05$ ,  $**p < 0.01$ ,  $***p < 0.001$ ) was also used to compare calcium  
745 responses associated with low and high arousal, or low and high running speed. PCA loadings of different  
746 areas and TCA trial factors of trial types with and w/o reinforcement were compared with Mann-Whitney test. If  
747 not otherwise indicated, data are presented as mean  $\pm$  SEM.

748

## 749 **Off-line motion correction**

750  
751 In the case of chessboard scanning, neuronal somata were selected from a z stack, then the selected square  
752 regions of interest were arranged as a 2D chessboard. Since the motion of a single frame during the scanning  
753 period as well as the relative rotation between subsequent frames, were not relevant, the transformation to be  
754 corrected could be approximated by a simple translational transformation between the scanning periods of the  
755 different frames. For efficiency, an algorithm based on fast Fourier transformation was used (Fuster and  
756 Bressler, 2015; Guizar-Sicairos et al., 2008). The template images were chosen either manually or by selecting  
757 the best correlating 20% of the relevant ROIs on all frames.

758 In some cases, images were also preprocessed, by either adaptive histogram equalization or simple median  
759 filtering. The image registration algorithm also provided the error of matching the moving images to the template  
760 images. As the drifting and scanning parameters were identical for each scanned ROI, we calculated the final  
761 displacement vector as the median of a fixed percentage of all ROIs with the smallest matching errors.

## 762 **MULTIMEDIA FILES**

### 763 **Movie S1. related to Figure 1. Recording sparse interneuronal population in large volume**

764  
765 *Z-stack from half mm<sup>3</sup> neocortical volume was obtained in the parietal cortex. Then small squares containing*  
766 *the VIP interneurons' somata were selected as ROIs. The squares were rearranged to form a 2D matrix to*  
767 *track the cell activity.*

### 768 **Movie S2. related to Figure 1. VIP population activity during an auditory discrimination task.**

769  
770 *Example false alarm trial of an imaging session with pupillometry, velocity recording and motion corrected*  
771 *calcium imaging of 52 VIP interneurons. Flashing white speaker and red air cloud icons mark the tone and air*  
772 *puff onsets.*

## 773 **DATA AVAILABILITY**

774  
775 Data are available upon request from Balázs Rózsa and Adam Kepecs (rozsabal@koki.hu,  
776 akepecs@wustl.edu).

## 777 **CODE AVAILABILITY**

778  
779 Custom written analysis codes are available at <https://github.com/QuentinNeuro>.

## 780 **AUTHOR CONTRIBUTIONS**

781  
782 The project was initiated and the experiments were conceived by A.K, H.P., B.R., Z.S., carried out by Z.S., H.P.,  
783 Q.C., B.C, and analyzed by Z.S., H.P., Q.C., K.Ó. TCA was performed by K.Ó. and Q.C. Scanning strategies  
784 were developed by G.K. and K.Ó. F.A. helped with fiber photometry. Z.S., H.P., Q.C., B.R. and A.K. wrote the  
785 manuscript with comments from all authors.

## 786 **ACKNOWLEDGEMENTS**

787  
788 We thank Lídia Popara, Áron Szepesi, and Alexandra Bojdán for technical help, and all members of the Kepecs  
789 and Rózsa labs for their helpful comments. This study was supported by KFI-2018-00097, VKE-2018-00032,

796 NKP-2017-00001, KTIA\_NAP\_12-2-2015-0006, 2017-1.2.1-NKP-2017-00002, GINOP\_2.1.1-15-2016-00979,  
797 and János Bolyai Research Scholarship of the Hungarian Academy of Sciences. The project was implemented  
798 with the support from the National Research, Development and Innovation Fund of Hungary financed under  
799 the VKSZ\_14-1-2015-0155, KFI\_16-1-2016-0177, NVKP\_16-1-2016-0043 funding scheme. This project  
800 received funding from the European Research Council (ERC) under the European Union's Horizon 2020  
801 research and innovation programme (grant agreement No. 682426 and VISGEN\_734862, 712821-NEURAM).  
802 H.P. is supported by NARSAD Young Investigator Grant and NIH R01MH110391. The study received funding  
803 from the National Institutes of Health, R01NS075531 and R01NS088661, to A.K.

804

## 805 **DECLARATION OF INTERESTS**

806

807 G.K. and B.R. are founders of Femtonics Ltd. B.R. is a member of its scientific advisory board.

808

## 809 **REFERENCES**

810

- 811 Acsady, L., Gorcs, T.J., and Freund, T.F. (1996). Different populations of vasoactive intestinal polypeptide-  
812 immunoreactive interneurons are specialized to control pyramidal cells or interneurons in the hippocampus.  
813 *Neuroscience* **73**, 317-334.
- 814 Alitto, H.J., and Dan, Y. (2012). Cell-type-specific modulation of neocortical activity by basal forebrain input.  
815 *Frontiers in systems neuroscience* **6**, 79.
- 816 Allen, W.E., Kauvar, I.V., Chen, M.Z., Richman, E.B., Yang, S.J., Chan, K., Gradinaru, V., Deverman, B.E.,  
817 Luo, L., and Deisseroth, K. (2017). Global Representations of Goal-Directed Behavior in Distinct Cell Types of  
818 Mouse Neocortex. *Neuron* **94**, 891-907 e896.
- 819 Attinger, A., Wang, B., and Keller, G.B. (2017). Visuomotor Coupling Shapes the Functional Development of  
820 Mouse Visual Cortex. *Cell* **169**, 1291-1302 e1214.
- 821 Batista-Brito, R., Vinck, M., Ferguson, K.A., Chang, J.T., Laubender, D., Lur, G., Mossner, J.M., Hernandez,  
822 V.G., Ramakrishnan, C., Deisseroth, K., *et al.* (2017). Developmental Dysfunction of VIP Interneurons Impairs  
823 Cortical Circuits. *Neuron* **95**, 884-895 e889.
- 824 Chen, N., Sugihara, H., and Sur, M. (2015). An acetylcholine-activated microcircuit drives temporal dynamics  
825 of cortical activity. *Nat Neurosci* **18**, 892-902.
- 826 Chen, X., Leischner, U., Varga, Z., Jia, H., Deca, D., Rochefort, N.L., and Konnerth, A. (2012). LOTOS-based  
827 two-photon calcium imaging of dendritic spines in vivo. *Nature protocols* **7**, 1818-1829.
- 828 Cohen, J.Y., Amoroso, M.W., and Uchida, N. (2015). Serotonergic neurons signal reward and punishment on  
829 multiple timescales. *eLife* **4**.
- 830 Cui, G., Jun, S.B., Jin, X., Pham, M.D., Vogel, S.S., Lovinger, D.M., and Costa, R.M. (2013). Concurrent  
831 activation of striatal direct and indirect pathways during action initiation. *Nature* **494**, 238-242.
- 832 Dipoppa, M., Ranson, A., Krumin, M., Pachitariu, M., Carandini, M., and Harris, K.D. (2018). Vision and  
833 Locomotion Shape the Interactions between Neuron Types in Mouse Visual Cortex. *Neuron* **98**, 602-615 e608.
- 834 Donato, F., Rompani, S.B., and Caroni, P. (2013). Parvalbumin-expressing basket-cell network plasticity  
835 induced by experience regulates adult learning. *Nature* **504**, 272-276.
- 836 Felleman, D.J., and Van Essen, D.C. (1991). Distributed hierarchical processing in the primate cerebral cortex.  
837 *Cereb Cortex* **1**, 1-47.
- 838 Fu, Y., Kaneko, M., Tang, Y., Alvarez-Buylla, A., and Stryker, M.P. (2015). A cortical disinhibitory circuit for  
839 enhancing adult plasticity. *eLife* **4**, e05558.
- 840 Fu, Y., Tucciarone, J.M., Espinosa, J.S., Sheng, N., Darcy, D.P., Nicoll, R.A., Huang, Z.J., and Stryker, M.P.  
841 (2014). A cortical circuit for gain control by behavioral state. *Cell* **156**, 1139-1152.
- 842 Fuster, J.M., and Bressler, S.L. (2015). Past makes future: role of pFC in prediction. *Journal of cognitive*  
843 *neuroscience* **27**, 639-654.
- 844 Garcia-Junco-Clemente, P., Ikrar, T., Tring, E., Xu, X., Ringach, D.L., and Trachtenberg, J.T. (2017). An  
845 inhibitory pull-push circuit in frontal cortex. *Nat Neurosci* **20**, 389-392.
- 846 Gasselín, C., Hohl, B., Vernet, A., Crochet, S., and Petersen, C.C.H. (2021). Cell-type-specific nicotinic input  
847 disinhibits mouse barrel cortex during active sensing. *Neuron* **109**, 778-787 e773.

- 848 Gentet, L.J., Kremer, Y., Taniguchi, H., Huang, Z.J., Staiger, J.F., and Petersen, C.C. (2012). Unique functional  
849 properties of somatostatin-expressing GABAergic neurons in mouse barrel cortex. *Nat Neurosci* 15, 607-612.
- 850 Goltstein, P.M., Reinert, S., Bonhoeffer, T., and Hubener, M. (2021). Mouse visual cortex areas represent  
851 perceptual and semantic features of learned visual categories. *Nat Neurosci* 24, 1441-1451.
- 852 Guerguiev, J., Lillicrap, T.P., and Richards, B.A. (2017). Towards deep learning with segregated dendrites.  
853 *eLife* 6.
- 854 Guizar-Sicairos, M., Thurman, S.T., and Fienup, J.R. (2008). Efficient subpixel image registration algorithms.  
855 *Optics letters* 33, 156-158.
- 856 Gunaydin, L.A., Grosenick, L., Finkelstein, J.C., Kauvar, I.V., Fenno, L.E., Adhikari, A., Lammel, S., Mirzabekov,  
857 J.J., Airan, R.D., Zalocusky, K.A., *et al.* (2014). Natural neural projection dynamics underlying social behavior.  
858 *Cell* 157, 1535-1551.
- 859 Hangya, B., Ranade, S.P., Lorenc, M., and Kepecs, A. (2015). Central Cholinergic Neurons Are Rapidly  
860 Recruited by Reinforcement Feedback. *Cell* 162, 1155-1168.
- 861 Harris, K.D., and Thiele, A. (2011). Cortical state and attention. *Nat Rev Neurosci* 12, 509-523.
- 862 He, M., Tucciarone, J., Lee, S., Nigro, M.J., Kim, Y., Levine, J.M., Kelly, S.M., Krugikov, I., Wu, P., Chen, Y.,  
863 *et al.* (2016). Strategies and Tools for Combinatorial Targeting of GABAergic Neurons in Mouse Cerebral Cortex.  
864 *Neuron* 92, 555.
- 865 Helmchen, F., and Denk, W. (2005). Deep tissue two-photon microscopy. *Nature methods* 2, 932-940.
- 866 Horton, N.G., Wang, K., Kobat, D., Clark, C.G., Wise, F.W., Schaffer, C.B., and Xu, C. (2013). In vivo three-  
867 photon microscopy of subcortical structures within an intact mouse brain. *Nature photonics* 7.
- 868 Ibrahim, G.M., Anderson, R., Akiyama, T., Ochi, A., Otsubo, H., Singh-Cadieux, G., Donner, E., Rutka, J.T.,  
869 Snead, O.C., 3rd, and Doesburg, S.M. (2013). Neocortical pathological high-frequency oscillations are  
870 associated with frequency-dependent alterations in functional network topology. *Journal of neurophysiology*  
871 110, 2475-2483.
- 872 Ibrahim, L.A., Mesik, L., Ji, X.Y., Fang, Q., Li, H.F., Li, Y.T., Zingg, B., Zhang, L.I., and Tao, H.W. (2016). Cross-  
873 Modality Sharpening of Visual Cortical Processing through Layer-1-Mediated Inhibition and Disinhibition.  
874 *Neuron* 89, 1031-1045.
- 875 Jackson, J., Ayzenshtat, I., Karnani, M.M., and Yuste, R. (2016). VIP+ interneurons control neocortical activity  
876 across brain states. *Journal of neurophysiology* 115, 3008-3017.
- 877 Kamigaki, T., and Dan, Y. (2017). Delay activity of specific prefrontal interneuron subtypes modulates memory-  
878 guided behavior. *Nat Neurosci* 20, 854-863.
- 879 Katona, G., Szalay, G., Maak, P., Kaszas, A., Veress, M., Hillier, D., Chiovini, B., Vizi, E.S., Roska, B., and  
880 Rozsa, B. (2012). Fast two-photon in vivo imaging with three-dimensional random-access scanning in large  
881 tissue volumes. *Nature methods* 9, 201-208.
- 882 Kerlin, A.M., Andermann, M.L., Berezovskii, V.K., and Reid, R.C. (2010). Broadly tuned response properties of  
883 diverse inhibitory neuron subtypes in mouse visual cortex. *Neuron* 67, 858-871.
- 884 Khan, A.G., Poort, J., Chadwick, A., Blot, A., Sahani, M., Mrsic-Flogel, T.D., and Hofer, S.B. (2018). Distinct  
885 learning-induced changes in stimulus selectivity and interactions of GABAergic interneuron classes in visual  
886 cortex. *Nat Neurosci* 21, 851-859.
- 887 Kim, Y., Yang, G.R., Pradhan, K., Venkataraju, K.U., Bota, M., Garcia Del Molino, L.C., Fitzgerald, G., Ram,  
888 K., He, M., Levine, J.M., *et al.* (2017). Brain-wide Maps Reveal Stereotyped Cell-Type-Based Cortical  
889 Architecture and Subcortical Sexual Dimorphism. *Cell* 171, 456-469 e422.
- 890 Kirkcaldie, M. (2012). *The Mouse Nervous System* (Academic Press).
- 891 Kolda, T.G., and Bader, B.W. (2009). Tensor Decompositions and Applications. *Society for Industrial and*  
892 *Applied Mathematics* 51, 455-500
- 893 Krabbe, S., Paradiso, E., d'Aquin, S., Bitterman, Y., Courtin, J., Xu, C., Yonehara, K., Markovic, M., Muller, C.,  
894 Eichlisberger, T., *et al.* (2019). Adaptive disinhibitory gating by VIP interneurons permits associative learning.  
895 *Nat Neurosci* 22, 1834-1843.
- 896 Kuchibhotla, K.V., Gill, J.V., Lindsay, G.W., Papadoyannis, E.S., Field, R.E., Sten, T.A., Miller, K.D., and  
897 Froemke, R.C. (2017). Parallel processing by cortical inhibition enables context-dependent behavior. *Nat*  
898 *Neurosci* 20, 62-71.
- 899 Lacefield, C.O., Pnevmatikakis, E.A., Paninski, L., and Bruno, R.M. (2019). Reinforcement Learning Recruits  
900 Somata and Apical Dendrites across Layers of Primary Sensory Cortex. *Cell reports* 26, 2000-2008 e2002.
- 901 Larkum, M.E., Nevian, T., Sandler, M., Polsky, A., and Schiller, J. (2009). Synaptic integration in tuft dendrites  
902 of layer 5 pyramidal neurons: a new unifying principle. *Science* 325, 756-760.



- 903 Lavzin, M., Rapoport, S., Polsky, A., Garion, L., and Schiller, J. (2012). Nonlinear dendritic processing  
904 determines angular tuning of barrel cortex neurons in vivo. *Nature* *490*, 397-401.
- 905 Lee, S., Kruglikov, I., Huang, Z.J., Fishell, G., and Rudy, B. (2013). A disinhibitory circuit mediates motor  
906 integration in the somatosensory cortex. *Nat Neurosci* *16*, 1662-1670.
- 907 Letzkus, J.J., Wolff, S.B., and Luthi, A. (2015). Disinhibition, a Circuit Mechanism for Associative Learning and  
908 Memory. *Neuron* *88*, 264-276.
- 909 Letzkus, J.J., Wolff, S.B., Meyer, E.M., Tovote, P., Courtin, J., Herry, C., and Luthi, A. (2011). A disinhibitory  
910 microcircuit for associative fear learning in the auditory cortex. *Nature* *480*, 331-335.
- 911 Marosi, M., Szalay, G., Katona, G., and Rózsa, B. (2019). High speed, random-access multiphoton microscopy  
912 for monitoring synaptic and neuronal activity in 3D in behaving animals. In *Multiphoton Microscopy*, E. Hartveit,  
913 ed. (Humana Press), pp. 335-362.
- 914 Mesik, L., Ma, W.P., Li, L.Y., Ibrahim, L.A., Huang, Z.J., Zhang, L.I., and Tao, H.W. (2015). Functional response  
915 properties of VIP-expressing inhibitory neurons in mouse visual and auditory cortex. *Frontiers in neural circuits*  
916 *9*, 22.
- 917 Monk, K.J., Allard, S., and Hussain Shuler, M.G. (2020). Reward Timing and Its Expression by Inhibitory  
918 Interneurons in the Mouse Primary Visual Cortex. *Cereb Cortex* *30*, 4662-4676.
- 919 Musall, S., Kaufman, M.T., Juavinett, A.L., Gluf, S., and Churchland, A.K. (2019). Single-trial neural dynamics  
920 are dominated by richly varied movements. *Nat Neurosci* *22*, 1677-1686.
- 921 Nadella, K.M., Ros, H., Baragli, C., Griffiths, V.A., Konstantinou, G., Koimtzis, T., Evans, G.J., Kirkby, P.A., and  
922 Silver, R.A. (2016). Random-access scanning microscopy for 3D imaging in awake behaving animals. *Nature*  
923 *methods* *13*, 1001-1004.
- 924 Nelson, A., Schneider, D.M., Takatoh, J., Sakurai, K., Wang, F., and Mooney, R. (2013). A circuit for motor  
925 cortical modulation of auditory cortical activity. *The Journal of neuroscience : the official journal of the Society*  
926 *for Neuroscience* *33*, 14342-14353.
- 927 Pakan, J.M., Lowe, S.C., Dylida, E., Keemink, S.W., Currie, S.P., Coutts, C.A., and Rochefort, N.L. (2016).  
928 Behavioral-state modulation of inhibition is context-dependent and cell type specific in mouse visual cortex.  
929 *eLife* *5*.
- 930 Palmer, L.M., Shai, A.S., Reeve, J.E., Anderson, H.L., Paulsen, O., and Larkum, M.E. (2014). NMDA spikes  
931 enhance action potential generation during sensory input. *Nat Neurosci* *17*, 383-390.
- 932 Pfeffer, C.K., Xue, M., He, M., Huang, Z.J., and Scanziani, M. (2013). Inhibition of inhibition in visual cortex:  
933 the logic of connections between molecularly distinct interneurons. *Nat Neurosci* *16*, 1068-1076.
- 934 Pi, H.J., Hangya, B., Kvitsiani, D., Sanders, J.I., Huang, Z.J., and Kepecs, A. (2013). Cortical interneurons that  
935 specialize in disinhibitory control. *Nature* *503*, 521-524.
- 936 Pinto, L., and Dan, Y. (2015). Cell-Type-Specific Activity in Prefrontal Cortex during Goal-Directed Behavior.  
937 *Neuron* *87*, 437-450.
- 938 Pronneke, A., Scheuer, B., Wagener, R.J., Mock, M., Witte, M., and Staiger, J.F. (2015). Characterizing VIP  
939 Neurons in the Barrel Cortex of VIPcre/tdTomato Mice Reveals Layer-Specific Differences. *Cereb Cortex* *25*,  
940 4854-4868.
- 941 Reid, A.T., Bzdok, D., Langner, R., Fox, P.T., Laird, A.R., Amunts, K., Eickhoff, S.B., and Eickhoff, C.R. (2016).  
942 Multimodal connectivity mapping of the human left anterior and posterior lateral prefrontal cortex. *Brain*  
943 *structure & function* *221*, 2589-2605.
- 944 Reimer, J., Froudarakis, E., Cadwell, C.R., Yatsenko, D., Denfield, G.H., and Tolias, A.S. (2014). Pupil  
945 fluctuations track fast switching of cortical states during quiet wakefulness. *Neuron* *84*, 355-362.
- 946 Sachidhanandam, S., Sermet, B.S., and Petersen, C.C.H. (2016). Parvalbumin-Expressing GABAergic  
947 Neurons in Mouse Barrel Cortex Contribute to Gating a Goal-Directed Sensorimotor Transformation. *Cell*  
948 *reports* *15*, 700-706.
- 949 Sanders, J.I., and Kepecs, A. (2014). A low-cost programmable pulse generator for physiology and behavior.  
950 *Frontiers in neuroengineering* *7*, 43.
- 951 Schumacher, F.K., Schumacher, L.V., Schelter, B.O., and Kaller, C.P. (2019). Functionally dissociating ventro-  
952 dorsal components within the rostro-caudal hierarchical organization of the human prefrontal cortex.  
953 *NeuroImage* *185*, 398-407.
- 954 Smith, S.L., Smith, I.T., Branco, T., and Hausser, M. (2013). Dendritic spikes enhance stimulus selectivity in  
955 cortical neurons in vivo. *Nature* *503*, 115-120.
- 956 Stringer, C., Pachitariu, M., Steinmetz, N., Reddy, C.B., Carandini, M., and Harris, K.D. (2019). Spontaneous  
957 behaviors drive multidimensional, brainwide activity. *Science* *364*, 255.

958 Szalay, G., Judak, L., Katona, G., Ocsai, K., Juhasz, G., Veress, M., Szadai, Z., Feher, A., Tompa, T., Chiovini,  
959 B., *et al.* (2016). Fast 3D Imaging of Spine, Dendritic, and Neuronal Assemblies in Behaving Animals. *Neuron*  
960 *92*, 723-738.

961 Tasic, B., Menon, V., Nguyen, T.N., Kim, T.K., Jarsky, T., Yao, Z., Levi, B., Gray, L.T., Sorensen, S.A., Dolbeare,  
962 T., *et al.* (2016). Adult mouse cortical cell taxonomy revealed by single cell transcriptomics. *Nat Neurosci* *19*,  
963 335-346.

964 Turi, G.F., Li, W.K., Chavlis, S., Pandi, I., O'Hare, J., Priestley, J.B., Grosmark, A.D., Liao, Z., Ladow, M., Zhang,  
965 J.F., *et al.* (2019). Vasoactive Intestinal Polypeptide-Expressing Interneurons in the Hippocampus Support  
966 Goal-Oriented Spatial Learning. *Neuron* *101*, 1150-1165 e1158.

967 Vinck, M., Batista-Brito, R., Knoblich, U., and Cardin, J.A. (2015). Arousal and locomotion make distinct  
968 contributions to cortical activity patterns and visual encoding. *Neuron* *86*, 740-754.

969 Williams, A.H., Kim, T.H., Wang, F., Vyas, S., Ryu, S.I., Shenoy, K.V., Schnitzer, M., Kolda, T.G., and Ganguli,  
970 S. (2018). Unsupervised Discovery of Demixed, Low-Dimensional Neural Dynamics across Multiple Timescales  
971 through Tensor Component Analysis. *Neuron* *98*, 1099-1115 e1098.

972 Williams, L.E., and Holtmaat, A. (2019). Higher-Order Thalamocortical Inputs Gate Synaptic Long-Term  
973 Potentiation via Disinhibition. *Neuron* *101*, 91-102 e104.

974 Yavorska, I., and Wehr, M. (2021). Effects of Locomotion in Auditory Cortex Are Not Mediated by the VIP  
975 Network. *Frontiers in neural circuits* *15*, 618881.

976 Yildirim, M., Sugihara, H., So, P.T.C., and Sur, M. (2019). Functional imaging of visual cortical layers and  
977 subplate in awake mice with optimized three-photon microscopy. *Nature communications* *10*, 177.

978 Zeisel, A., Hochgerner, H., Lonnerberg, P., Johnsson, A., Memic, F., van der Zwan, J., Haring, M., Braun, E.,  
979 Borm, L.E., La Manno, G., *et al.* (2018). Molecular Architecture of the Mouse Nervous System. *Cell* *174*, 999-  
980 1014 e1022.

981 Zhang, S., Xu, M., Kamigaki, T., Hoang Do, J.P., Chang, W.C., Jenvay, S., Miyamichi, K., Luo, L., and Dan, Y.  
982 (2014). Selective attention. Long-range and local circuits for top-down modulation of visual cortex processing.  
983 *Science* *345*, 660-665.

984

985 **SUPPLEMENTARY INFORMATION**

986

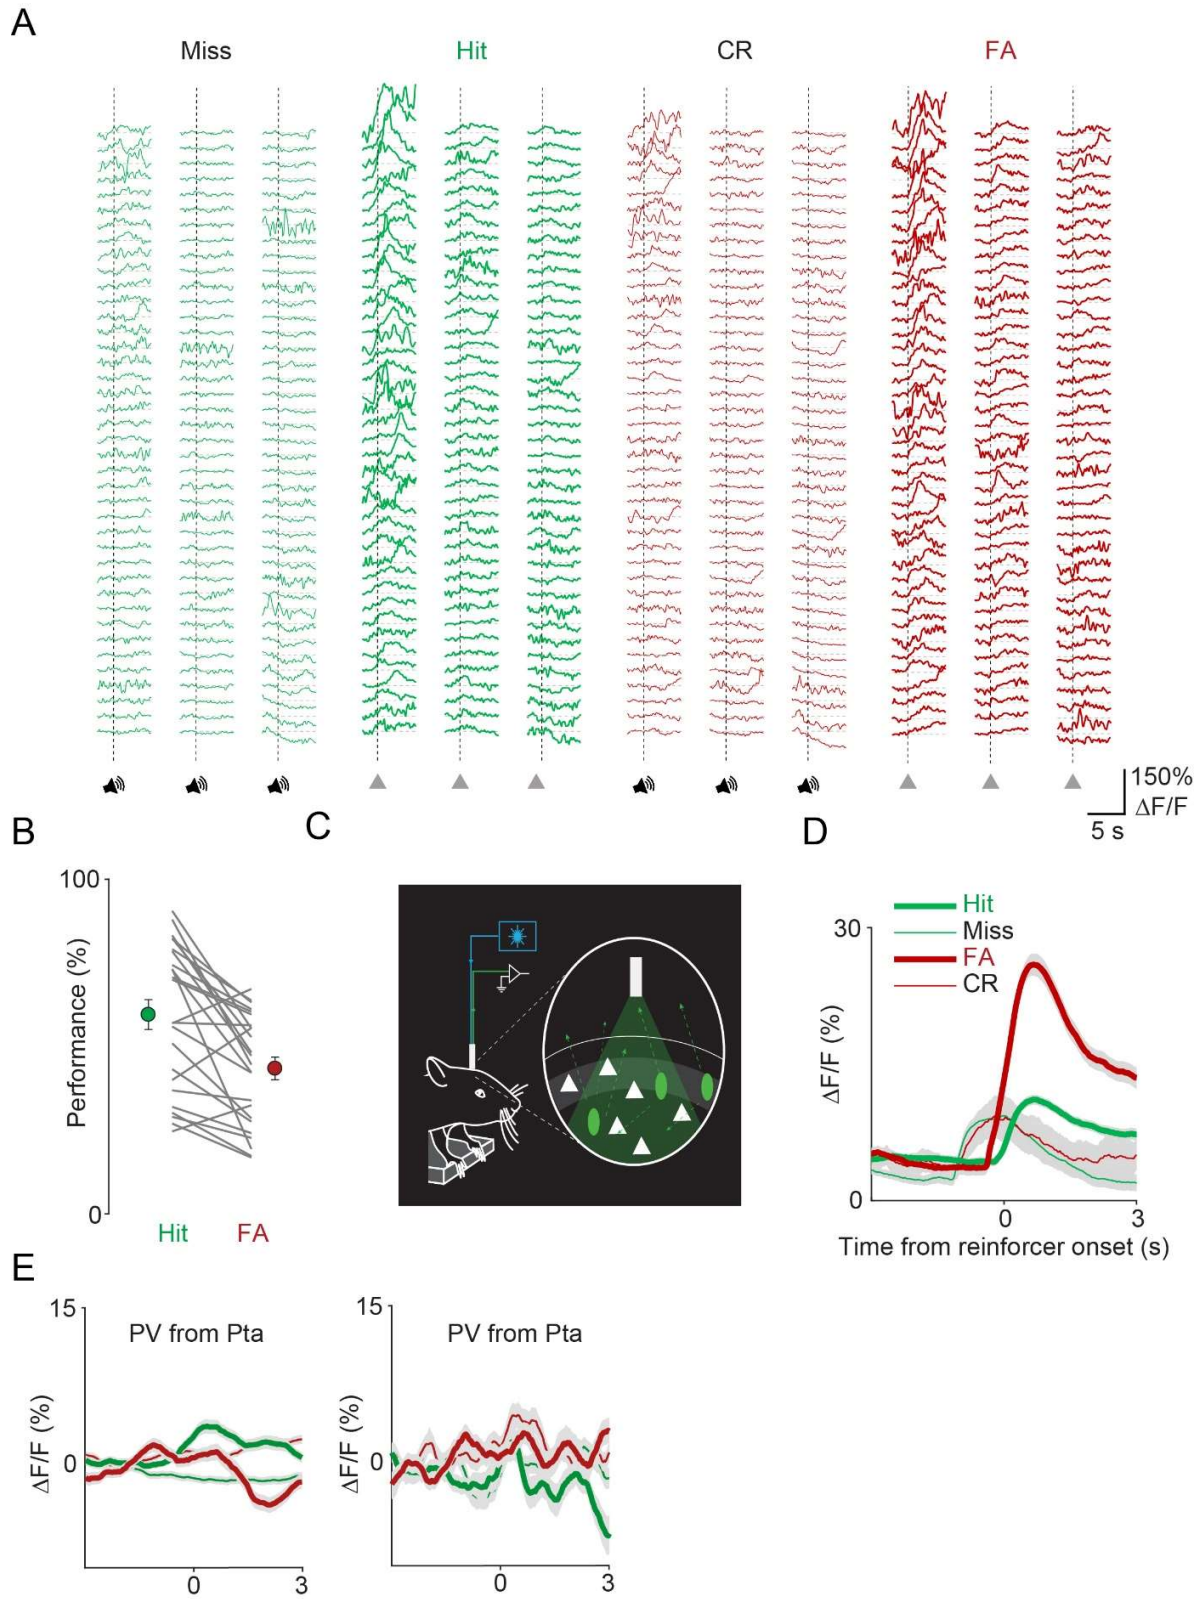

987

988

989

990

991

**Figure S1. related to Figure 1. 3D-random-access two-photon imaging and fiber photometry of VIP neurons in an auditory discrimination task**

992

993

**A)** *The somatic Ca<sup>2+</sup> responses in Figure 1C shown in transient form*

994

**B)** *Hit and FA rate of the mice during the imaging and fiber photometry sessions (n=24 sessions, n=22 mice).*

995

**C)** *Schematics of fiber photometry experiments.*

996

**D)** *Average transients of VIP interneurons (mean±SEM) for Hit (thick green), FA (thick red), Miss (thin green) and CR (thin red) recorded from the ACx using fiber photometry.*

997

998

**E)** *Average transients of PV interneurons (mean±SEM of n=17 and n=37 cells) for Hit (thick green), FA (thick red), Miss (thin green) and CR (thin red) recorded from the parietal cortex.*

999

1000

1001

A

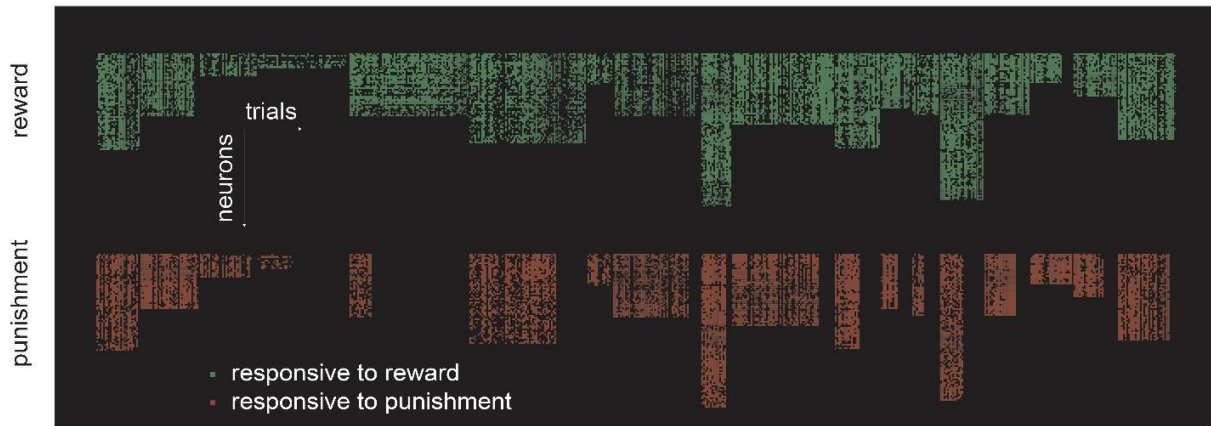

B

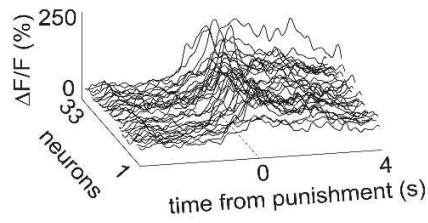

C

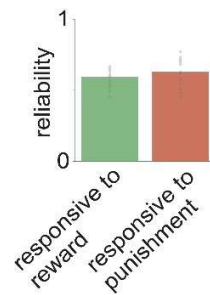

D

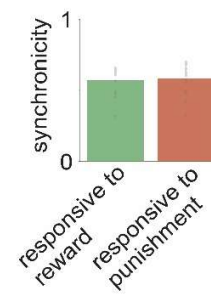

E

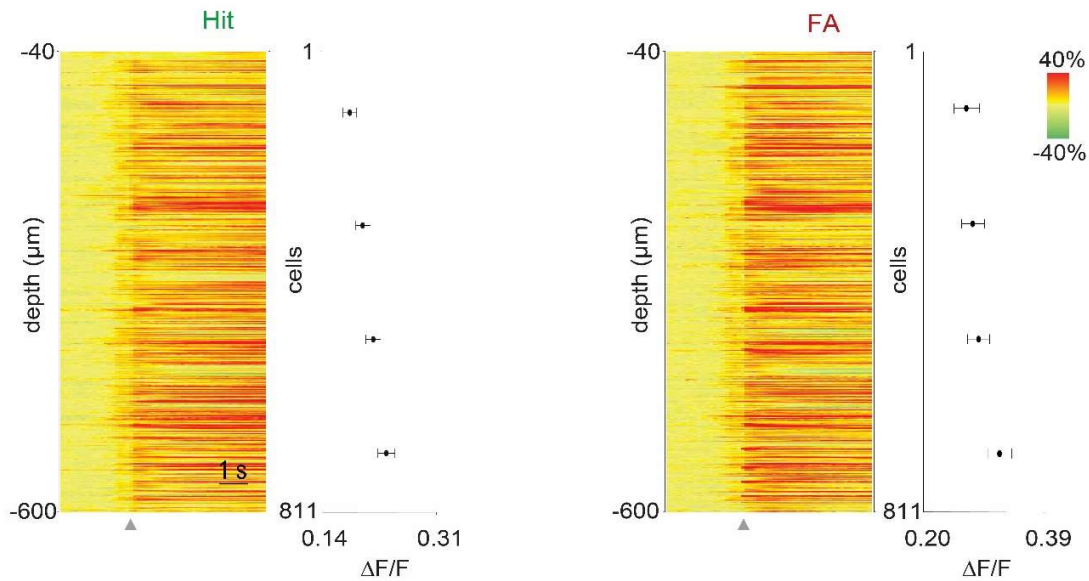

F

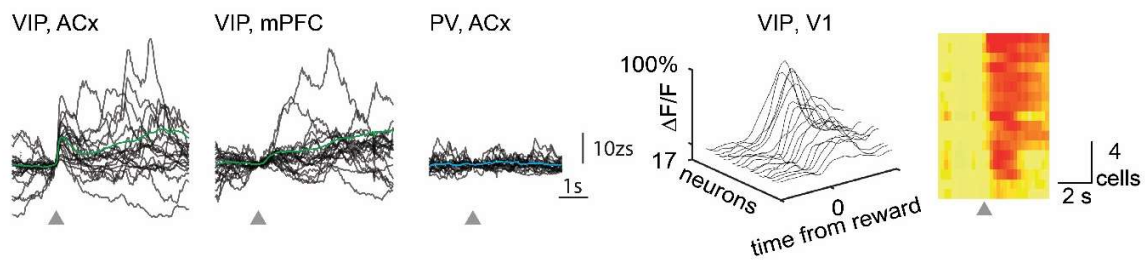

**Figure S2. related to Figure 2. Quantification of the activity of VIP neurons across the dorsal cortex**

1004  
1005  
1006  
1007  
1008  
1009  
1010  
1011  
1012  
1013  
1014  
1015  
1016  
1017  
1018

- A)** *Raster plot of the trial-to-trial activation of the responsive VIP neurons in Hit and FA trials during the two-photon imaging sessions (n=18 sessions, n=746 cells).*
- B)** *An example of the synchronous activation of the VIP neurons in a FA trial.*
- C)** *Reliability of the VIP neurons in Hit and FA trials.*
- D)** *Synchronicity of the VIP neurons in Hit and FA trials.*
- E)** *Left, raster plot of the average responses of the VIP neurons in Hit trials ordered according to their cortical depth. Graph shows the binned maximums of the averaged responses (bin size = 223 cells). Right, raster plot and graph for FA trials. Gray triangles mark reinforcement onset.*
- F)** *Single trial (black) and average (green or blue) VIP or PV interneuron z – scored activity recorded using fiber photometry during uncued reward delivery. Grey triangle shows the onset of the uncued reward. Right, single trial and average activity of VIP interneurons from V1 recorded with 2 – photon microscope during uncued reward delivery.*

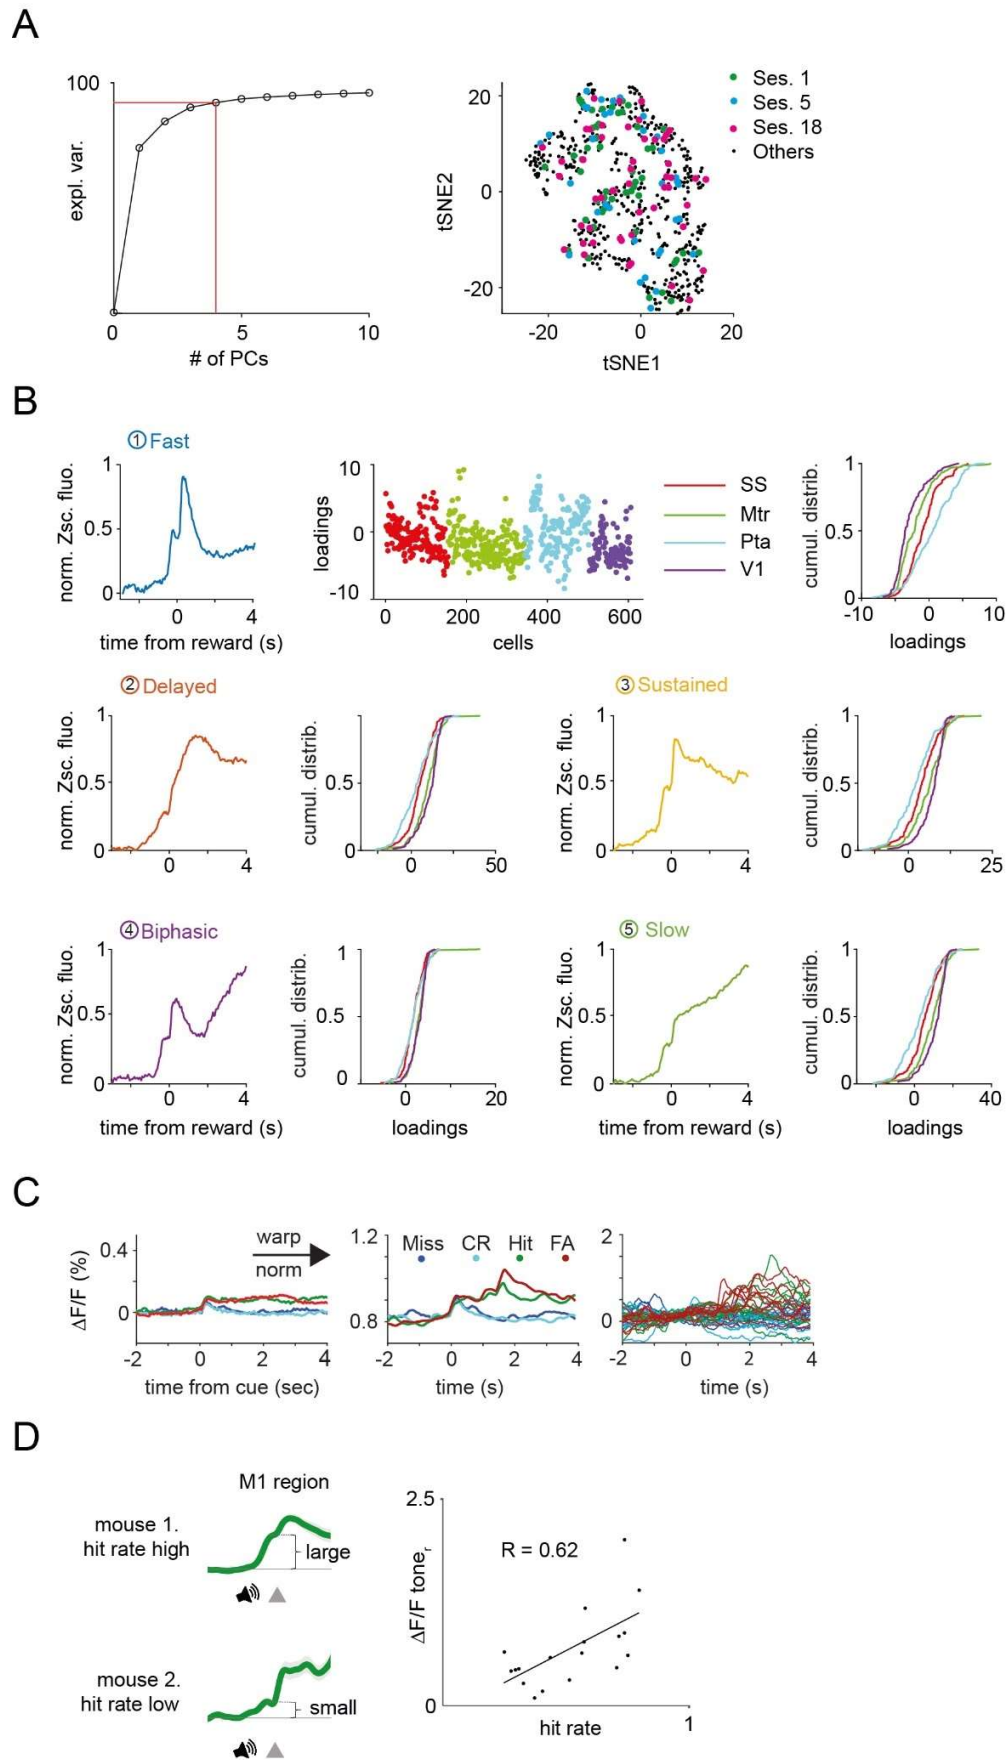

1021 **Figure S3. related to Figure 2. Heterogeneity in VIP neuronal responses across the dorsal cortex**

1022

1023

**A)** *Left, explained variance. We used 5 PCs, explaining >90% of the variance of our data for the k-means clustering. Right, neurons from individual recording sessions are scattered in the tSNE space.*

1024

1025

**B)** *Top, the first principal component, corresponding loadings, and regional cumulative distributions of the loadings. Middle and bottom, remaining principal components and the regional cumulative distributions of the corresponding loadings.*

1026

1027

1028

**C)** *Average activity of 17 VIP interneurons for different trial types before (left) and after (middle) TCA preprocessing. After smoothing, single trial neural activities corresponding to reaction time periods for hit and FA trials were time-wrapped to a fixed 1.5 sec in length. All recordings were rendered non-negative by subtracting the minimal  $\Delta F/F$  value for each cell. Data were finally normalized. Right, only the first 10 trials of each type were selected for the TCA.*

1029

1030

1031

1032

1033

**D)** *Heterogeneity of the cue responses. Left, higher hit rate was associated with larger tone related response components in the population average traces of Hit trials. Left, scatter plot of the size of the average tone response and the hit rate.*

1034

1035

1036



A

Pupil diameter change

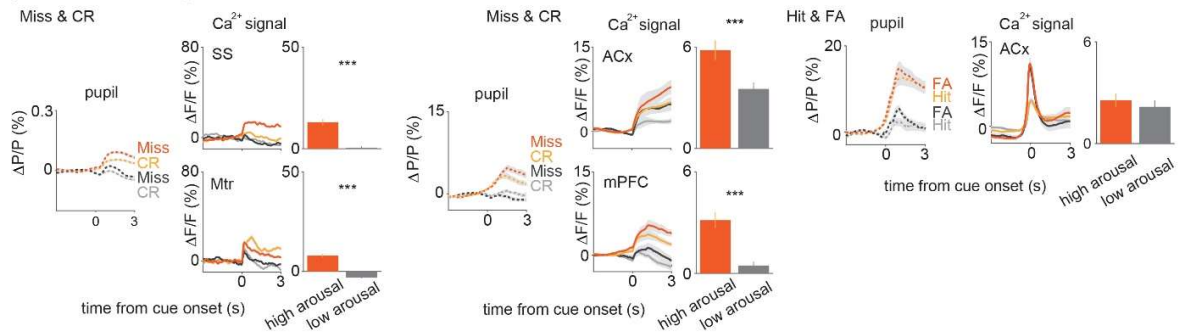

B

Baseline pupil diameter

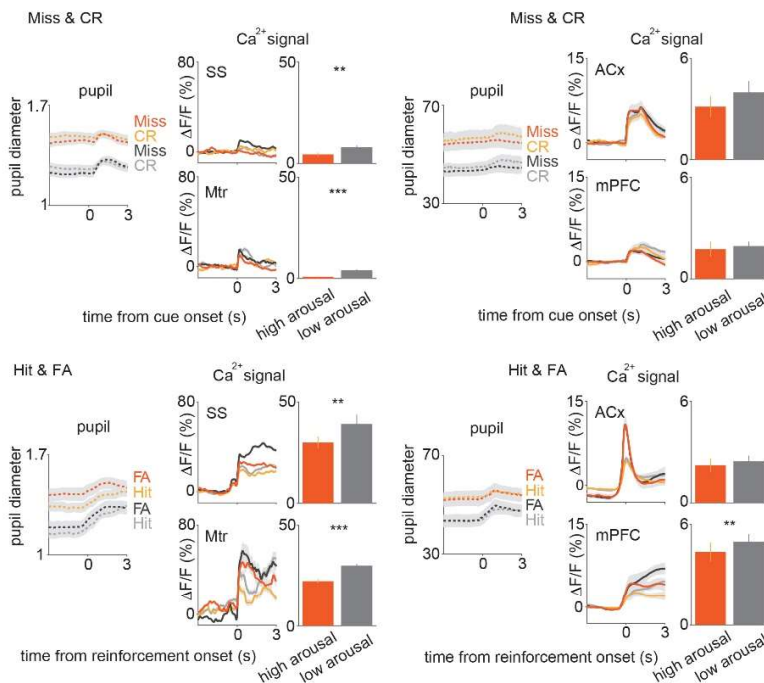

C

Pupil diameter change

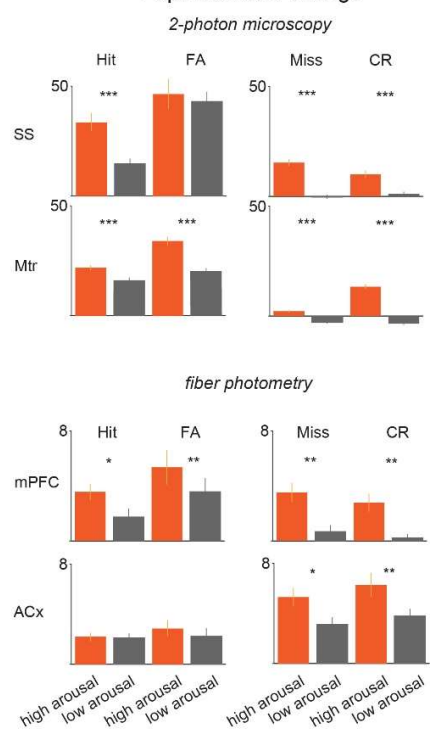

D

Speed change

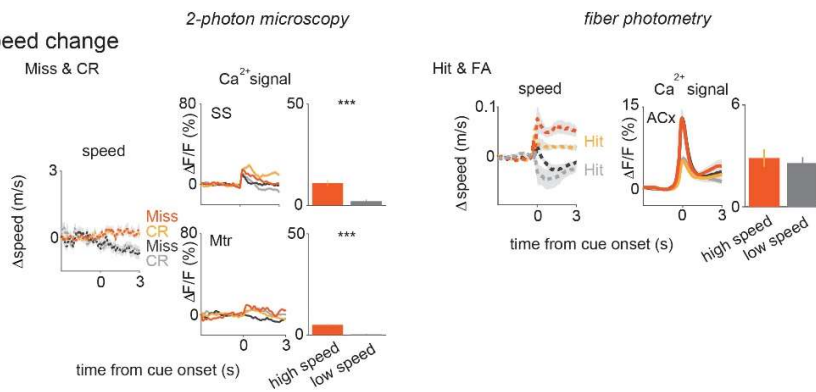

1037  
1038

1039  
1040  
1041  
1042  
1043  
1044  
1045  
1046  
1047  
1048  
1049  
1050  
1051  
1052

**Figure S4. related to Figure 3. The baseline and the change in pupil diameter, and the change of speed additionally modulate VIP neuronal activity on top of activation by cues and outcomes**

- A)** Population averages for Miss and CR (left and middle) during high and low arousal change in the SS and Mtr regions (left), and ACx and mPFC regions (middle). Right, population averages for Hit and FA in ACx. Bars indicate average peak amplitudes (mean±SEM).
- B)** Population averages for Miss and CR (top) and Hit and FA (bottom) by high and low baseline arousal levels in the SS and Mtr regions (left), and ACx and mPFC regions (right). Bars indicate average peak amplitudes (mean±SEM).
- C)** Average peak amplitude bars for Hit, FA, Miss and CR separately during high and low pupil change in the SS, Mtr, mPFC and ACx regions. (mean±SEM).
- D)** Population averages for Miss and CR (left) during high and low speed change in the SS and Mtr regions (left) and for Hit and FA in ACx (right). Bars indicate average peak amplitudes (mean±SEM).

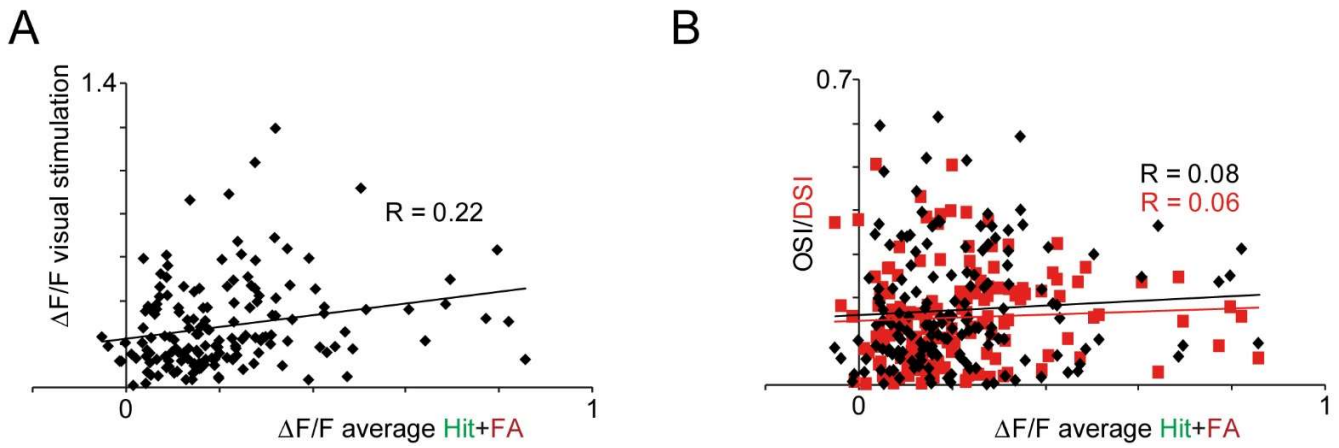

1053

1054

1055

1056

1057

1058

1059

1060

1061

1062

**Figure S5.** related to Figure 4. Quantification of the connection of the visual tuning parameters and reinforcement-related responses

**A)** Scatter plot of reinforcement- vs visual stimulation-induced responses of the same VIP cells.

**B)** Scatter plot of reinforcement-induced responses vs. OSI or DSI parameters of the same VIP cells.

1063

|                                                                                                                                                                                                                                                                                                                                                       | schematic of the method                                                             | name of the method                                                       | calculation of scanning speed               | $T_{measurement}$ ( $V_{measurement}$ )                                                                                                                                                                                                                                                                                                                                       | $V_{measurement}$ compared to chessboard scanning | ratio of collected photons compared to chessboard scanning ( $SNR^2$ ) | $SNR^2 \cdot V_{gain}$ compared to chessboard scanning |
|-------------------------------------------------------------------------------------------------------------------------------------------------------------------------------------------------------------------------------------------------------------------------------------------------------------------------------------------------------|-------------------------------------------------------------------------------------|--------------------------------------------------------------------------|---------------------------------------------|-------------------------------------------------------------------------------------------------------------------------------------------------------------------------------------------------------------------------------------------------------------------------------------------------------------------------------------------------------------------------------|---------------------------------------------------|------------------------------------------------------------------------|--------------------------------------------------------|
| AO SCANNING TECHNIQUES                                                                                                                                                                                                                                                                                                                                | 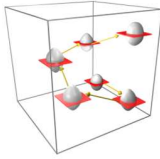   | 3D AO chessboard scanning                                                | $N_{cell} \times N_{line} \times T_{pixel}$ | 0.036 s (27.7 Hz)                                                                                                                                                                                                                                                                                                                                                             | 1                                                 | 1                                                                      | 1                                                      |
|                                                                                                                                                                                                                                                                                                                                                       |    | AO point by point scanning of the entire volume                          | $x \times y \times z \times T_{pixel}$      | 1611.5 s (0.0006 Hz)                                                                                                                                                                                                                                                                                                                                                          | 1/44762                                           | 1                                                                      | 1/44762                                                |
|                                                                                                                                                                                                                                                                                                                                                       |  | AO point by point scanning in layers containing cell somatas (19 layers) | $x \times y \times N_z \times T_{pixel}$    | 158.4 s (0.00631 Hz)                                                                                                                                                                                                                                                                                                                                                          | 1/4399                                            | 1                                                                      | 1/4399                                                 |
| RESONANT SCANNING TECHNIQUES                                                                                                                                                                                                                                                                                                                          |  | Volume scanning with resonant mirror                                     | $x \times y \times z \times T'_{pixel}$     | 6.1 s (0.16 Hz)                                                                                                                                                                                                                                                                                                                                                               | 1/170                                             | 1/244                                                                  | 1/41506                                                |
|                                                                                                                                                                                                                                                                                                                                                       |  | Multiple-layer scanning with resonant mirror and piezo (19 layers)       | $x \times y \times N_z \times T'_{pixel}$   | 0.98 s (1.04 Hz)                                                                                                                                                                                                                                                                                                                                                              | 1/27                                              | 1/244                                                                  | 1/6654                                                 |
| <p><b>*Used parameters:</b><br/> <math>N_{cell} = 120</math> (120 cells) <math>x = 548</math> pixel, <math>y = 507</math> pixel, <math>z = 193</math> pixel (total scanning volume was: <math>x = 689 \mu m</math>, <math>y = 639 \mu m</math>, <math>z = 580 \mu m</math>)<br/> <math>N_z = 19</math> (19 z layers were used in volume scanning)</p> |                                                                                     |                                                                          |                                             | <p><math>T'_{pixel} = 0.11 \mu s</math>, (pixel dwell time of resonant scanning, according to a <math>f = 16</math> kHz frequency and the <math>x = 548</math> pixel line resolution of the resonant scanner)<br/> <math>T_{pixel} = 30 \mu s</math>, (AO pixel dwell time)<br/> <math>N_{line} = 10</math> (number of lines used to form a frame in chessboard scanning)</p> |                                                   |                                                                        |                                                        |

1064

1065

**Table S1. related to Figure 1. Comparison of different scanning methods.**

1066  
1067  
1068  
1069  
1070  
1071  
1072

Scanning speed was calculated according to the equations in the column “calculation of scanning speed”. Ratio of collected photons was calculated from relative pixel dwell times. All parameters used for calculations are listed in the bottom field. Note, that chessboard scanning provides 170-fold faster measurement speed and 244-fold higher photon collection compared to volume scanning with resonant mirrors.

| <b>Animals</b>                  | <b>#1</b>   | <b>#2</b> | <b>#3</b> | <b>#4</b> |
|---------------------------------|-------------|-----------|-----------|-----------|
| total number of cells recorded  | 40          | 40        | 39        | 34        |
| number of cells with low SNR    | 4           | 1         | 0         | 2         |
| # of cells with low SNR         | 1,9,19,20   | 12        | 0         | 9,12      |
| number of non-responsive cells  | 4           | 1         | 1         | 1         |
| # of cells with no response (#) | 3,10,28,32  | 30        | 30        | 5         |
| responsive cells                | 36          | 39        | 39        | 32        |
| Ratio of responsive cells (%)   | 88.88       | 97.44     | 97.44     | 96.88     |
| Average ratio (% , mean±SEM)    | 95.16±2.09% |           |           |           |

1073  
1074  
1075

**Table S2. Calculation of ratio of responsive neurons following reward.**

## Baseline arousal level modulates VIP activity

We split the trials based on the baseline or inter-trial arousal level (**Figure S4B**). Thus, trials were split by the median value of the baseline pupil diameter. This analysis revealed that the arousal level in the baseline period inversely correlated with the degree of VIP activation by reinforcers. For instance, when baseline arousal level was low, the reinforcers tended to induce a stronger increase in VIP activity. When baseline arousal level was high, the reinforcers induced a smaller increase (high vs. low baseline: SS: 30% vs 39% ( $\Delta F/F$ ),  $n=26$ ,  $p<0.01$ ; Mtr: 23% vs 30% ( $\Delta F/F$ ),  $n=111$ ,  $p<0.001$ ; **Figure S4B**). Interestingly, the anti-correlation was also observed between baseline pupil diameter and the increase in pupil diameter. When the baseline pupil diameter was small, the increase in pupil diameter tended to be higher and vice versa (**Figure S4B**). Taken together, these results indicate that the baseline arousal level is another important factor that modulates VIP activity.

### Identifying responsive neurons

In this section, we will introduce a new method for selecting responsive neurons from large neuronal populations recorded simultaneously. The method is based on the following: 1) a thresholding method in which neurons with very poor SNR are eliminated at the beginning of the analysis; 2) baseline calculation in the pre-stimulus period; and 3) one sample t-test in the response period.

#### 1) The thresholding method

Majority of the cells showed robust spontaneous and reinforcement-related responses with variable amplitude and frequency. However, in some neurons, responses were below the detection threshold in a recording period of over 5 minutes. To eliminate neurons with low SNR we calculated the mean amplitude of the  $15\pm 5\%$  largest peaks detected in  $Ca^{2+}$  transients during the recording period of over 5 minutes and divided it by the average, pre-stimulus STD. Neurons with a (mean amplitude)/STD ratio below 5 were eliminated from the analysis. This threshold eliminated  $4.98\pm 0.01\%$  of the VIP cells (**Table S2**).

#### 2) Baseline calculation

There are many ways to define a neuron as responsive or non-responsive. For all definitions we need a baseline relative to which responsiveness can be calculated. The simplest approach is to define a pre-stimulus temporal interval ( $[T_{01}, T_{02}]$ ) before the cue onset as a baseline period, and calculate the mean,  $\mu_0$  (see below).

#### 3) One-sample t-test

In a one sample t-test, the null hypothesis is that the population mean is equal to a specified value ( $\mu_0$ ).

$$t = \frac{\bar{x} - \mu_0}{\frac{SD}{\sqrt{n}}}, \text{ Equation S3}$$

where SD and n are the standard deviation and sample size, respectively. The degrees of freedom (DF) is  $n-1$ . The distribution of the population of sample means ( $\bar{x}$ ) is assumed to be normal although this is not required for the parent population. The distribution of  $t_p$  will be approximately normal  $N(0,1)$  according to the central limit theorem. If we substitute SD with  $\sqrt{n} \times SEM$  where SEM is the standard error of the mean, we get the following criterium:

$$t \cdot SEM = \bar{x} - \mu_0, \text{ Equation S4}$$

1121

1122 In Student's t-test the  $\bar{x} \neq \mu_0$  hypothesis is accepted as significant if  $|t| > t_p$  where  $t_p$  is defined as  $(P(|t| > t_p) =$   
1123  $p$ , where P denotes probability. The Student's distribution defines  $t_p$  at a given DF ( $n-1$ ) and a given  $p$  value.  
1124 Therefore, we can define the following criterium for significance:

1125

$$1126 \quad t_p \cdot \text{SEM} < \bar{x} - \mu_0 \quad \text{or} \quad t_p \cdot \text{SEM} < -(\bar{x} - \mu_0), \quad \text{Equation S5}$$

1127

1128

1129

1130 The simplest approach to define a neuron as responsive is to calculate in a one-sample t-test whether the mean  
1131 response ( $\bar{x}$ ) of the neuron is significantly larger (or smaller) in a given interval after 0 ms (where 0 ms is the  
1132 time of the stimulus) than the baseline average value ( $\mu_0$ , which is equal to zero by definition). According to this  
1133 definition and **Equation S5**, a neuron is responsive if its average time-dependent response transient,  
1134 ( $\bar{x}(time)$ ) is larger during a given time interval than the product of  $t_p$  and the SEM of the population:

1135

$$1136 \quad t_p \cdot \text{SEM} < \bar{x}(time) \Big|_{[T_1, T_2]} \quad \text{Equation S6}$$

1137

1138 and for significantly smaller responses (for inhibition) we can use the modified second Equation from **Equation**  
1139 **S5**:

1140

$$1140 \quad t_p \cdot \text{sem} < -\bar{x}(time) \Big|_{[T_1, T_2]} \quad \text{Equation S7}$$

1141

1142 In practice, we defined the pre-stimulus baseline period, from 2 s before cue onset to the cue onset time. The  
1143 interval of responses was defined from the time of the reinforcement time (0 s) to 2 s after the reinforcement.  
1144 This also means that both  $T_1$  and  $T_2$  time values must be part of the [0 s, 2 s] response interval. In theory, there  
1145 is no limit to the minimum length of the  $[T_1, T_2]$  interval; however, in practice we used the  $T_2 - T_1 \geq 500$  ms criterium  
1146 which was in the range of the mean length of the single AP potential-induced response at half maximum.

1147

1148 The number of reward and punishment transients collected in a given experiment was variable (between 30  
1149 and 50) resulting in variable  $t_p$  values which had to be calculated for each experiment separately. For example,  
1150 a trial with 34 transients means 33 degrees of freedom (34-1) and  $t_p = 1.692$  ( $p < 0.05$ ; two tails). We performed  
1151 fast 3D recording of VIP interneurons (34-40 cells, from 4 mice, **Table S2**) and calculated the activation ratio.  
1152 The activation ratio for reward was  $95.16 \pm 2.09\%$ , which is a much higher ratio than that determined using the  
1153 standard one sample t-test above ( $76.22 \pm 9.65\%$ ).

1154
